# Supplementary material for: Evaluation of Four Commonly Used DNA Barcoding Loci for Chinese Medicinal Plants of the Family Schisandraceae
Source: PubMed Central journal article supplement (PMC4418597; doi:10.1371/journal.pone.0125574), 2015-05-04

ITS1 ML tree

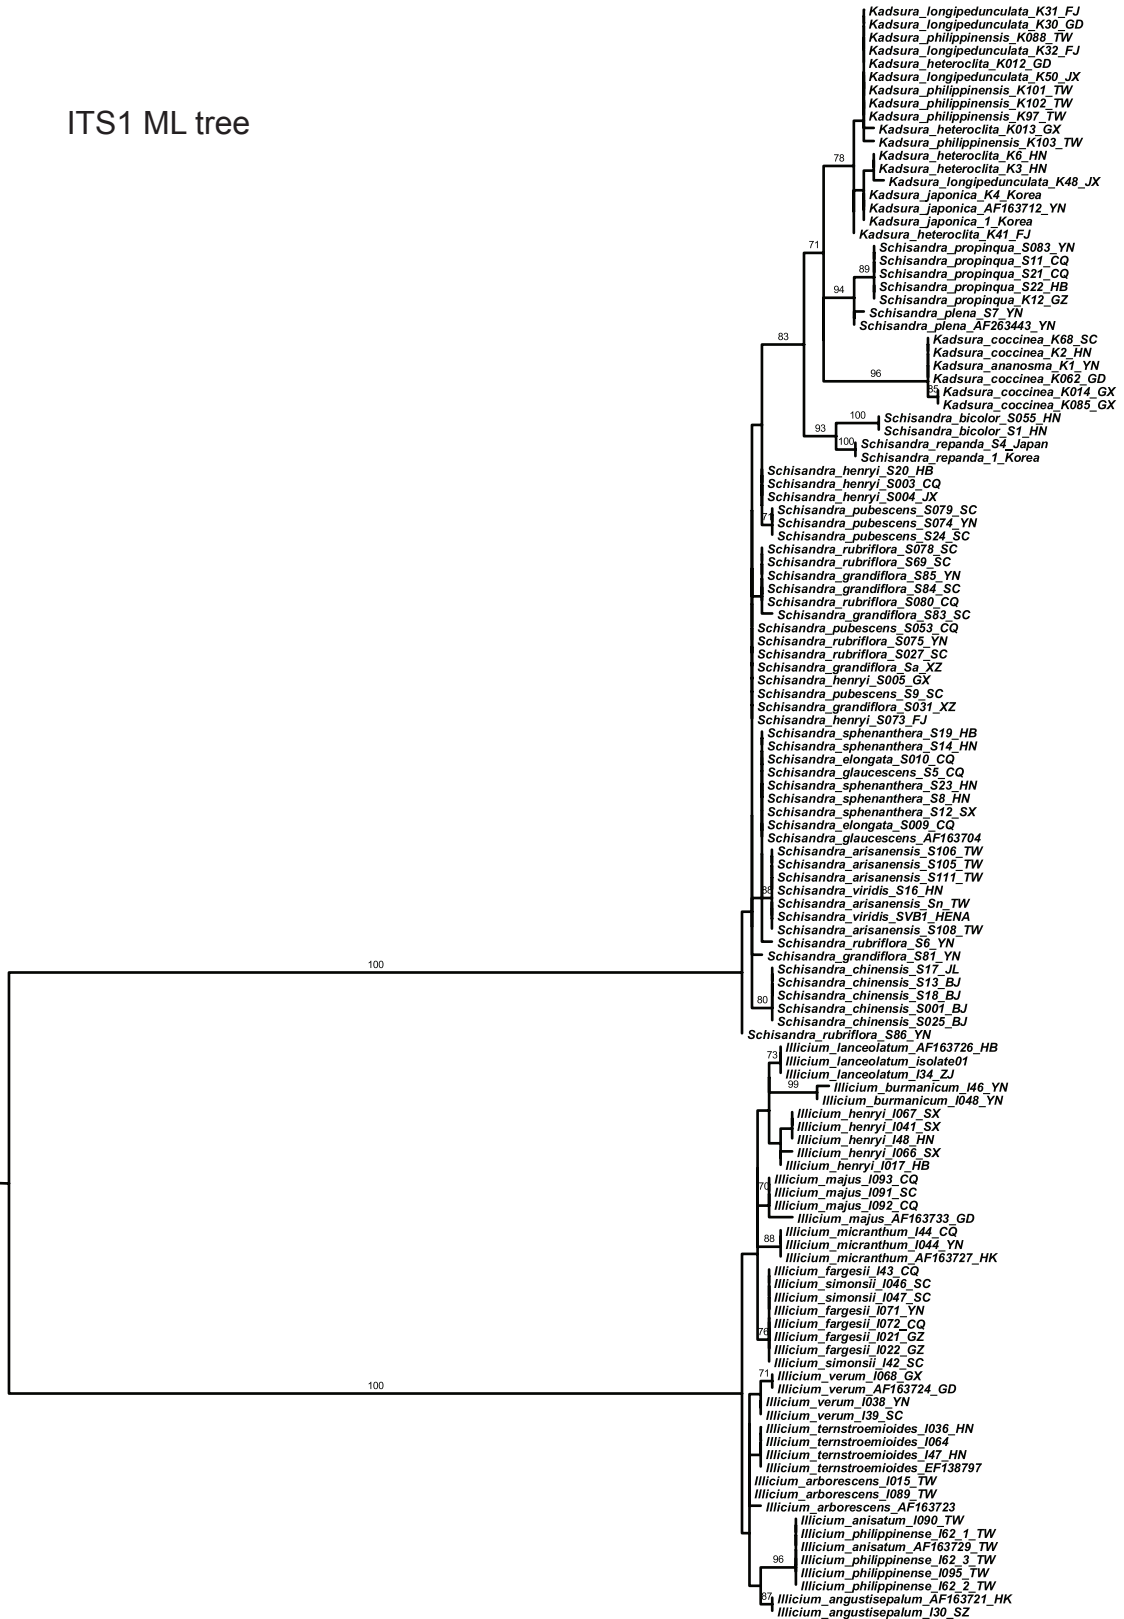

ITS2 ML tree

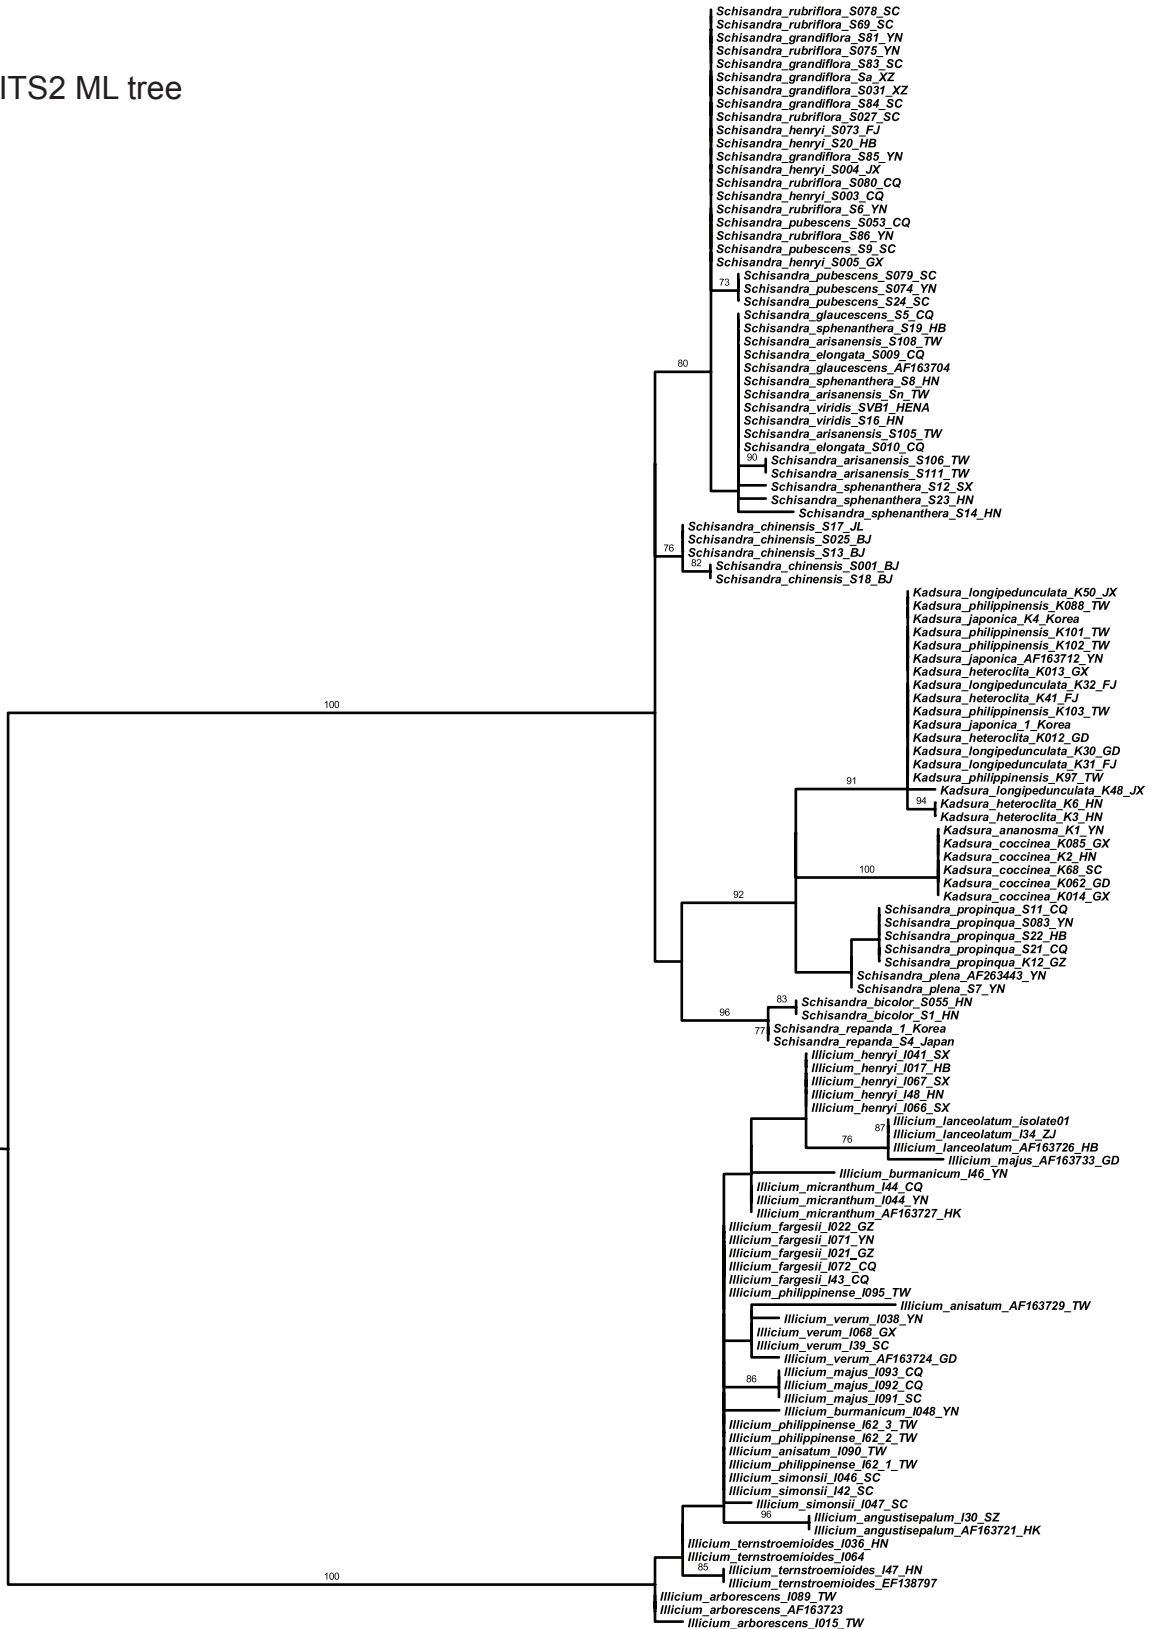

ITS ML tree

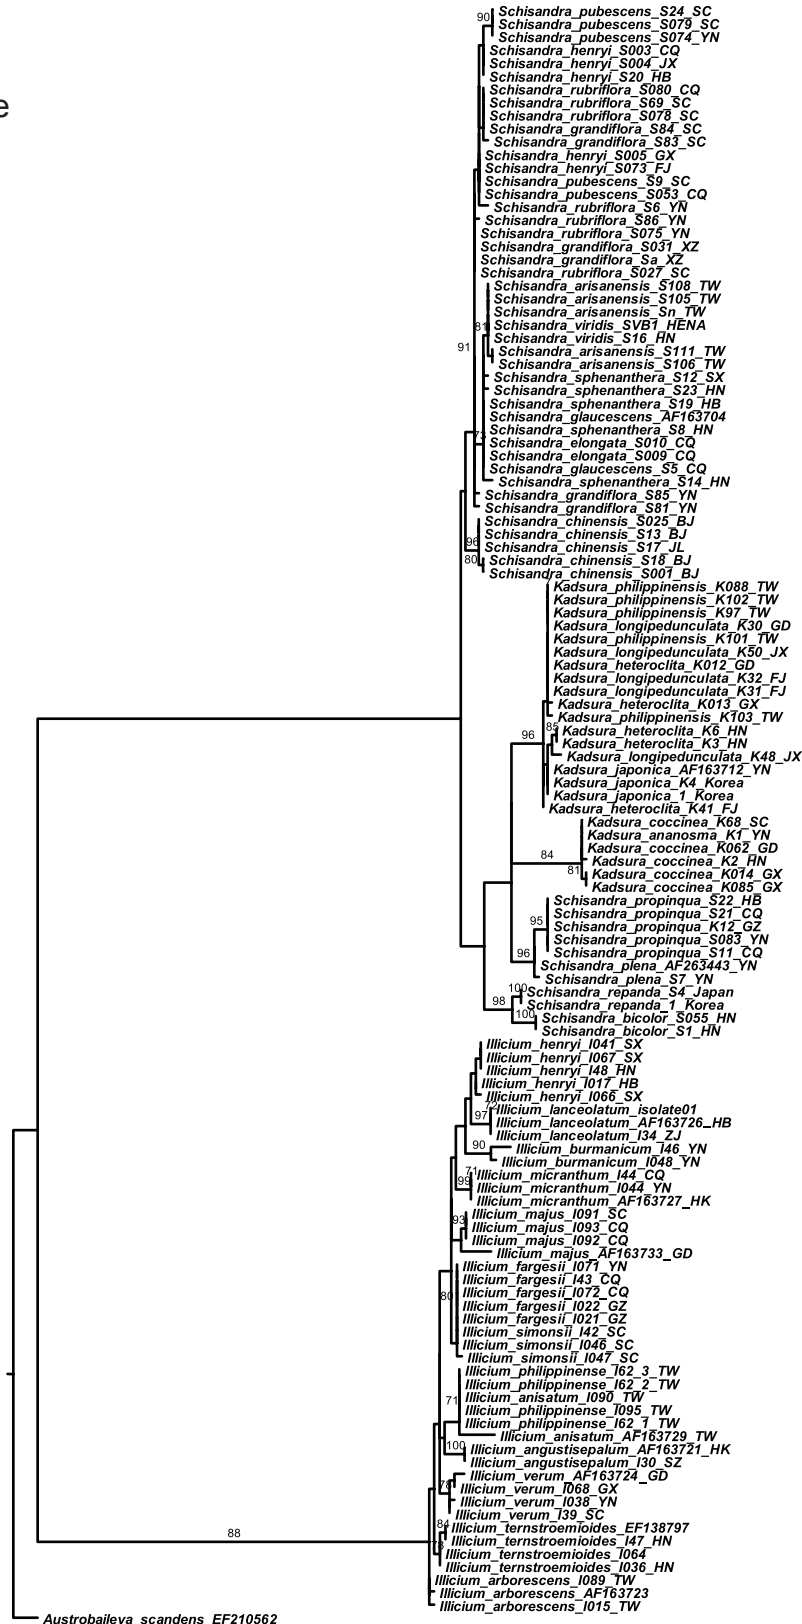

trnH-psbA ML tree

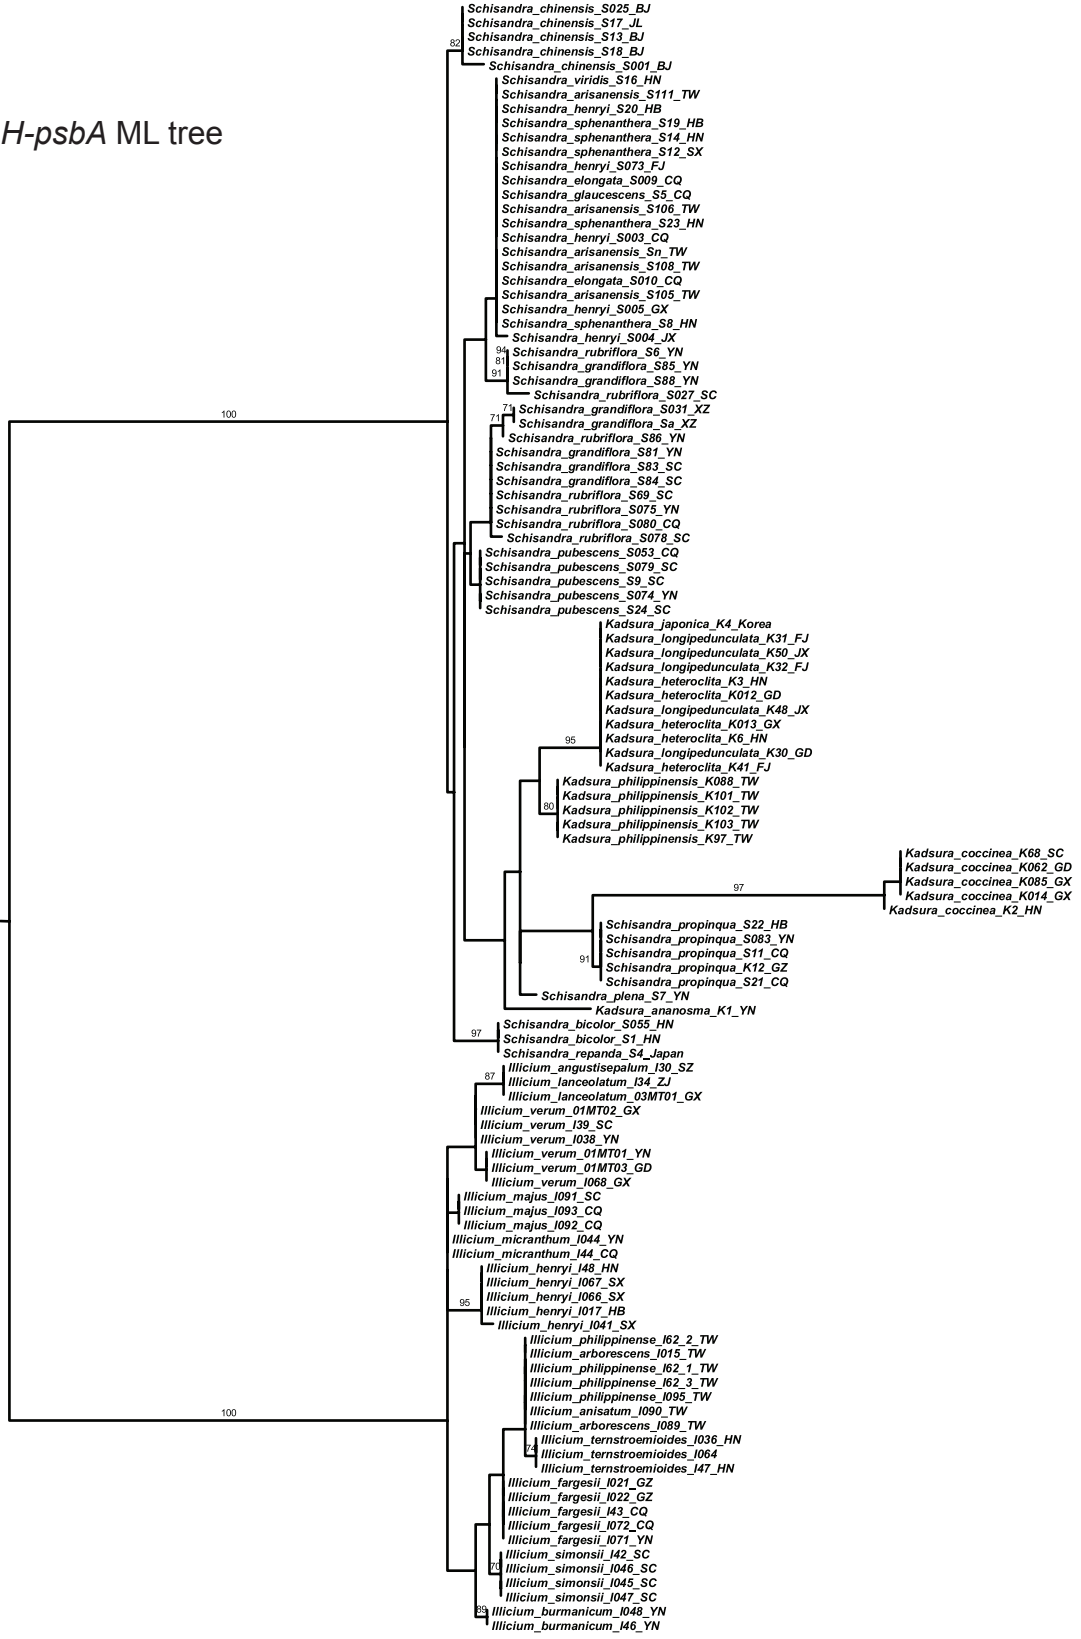

matK ML tree

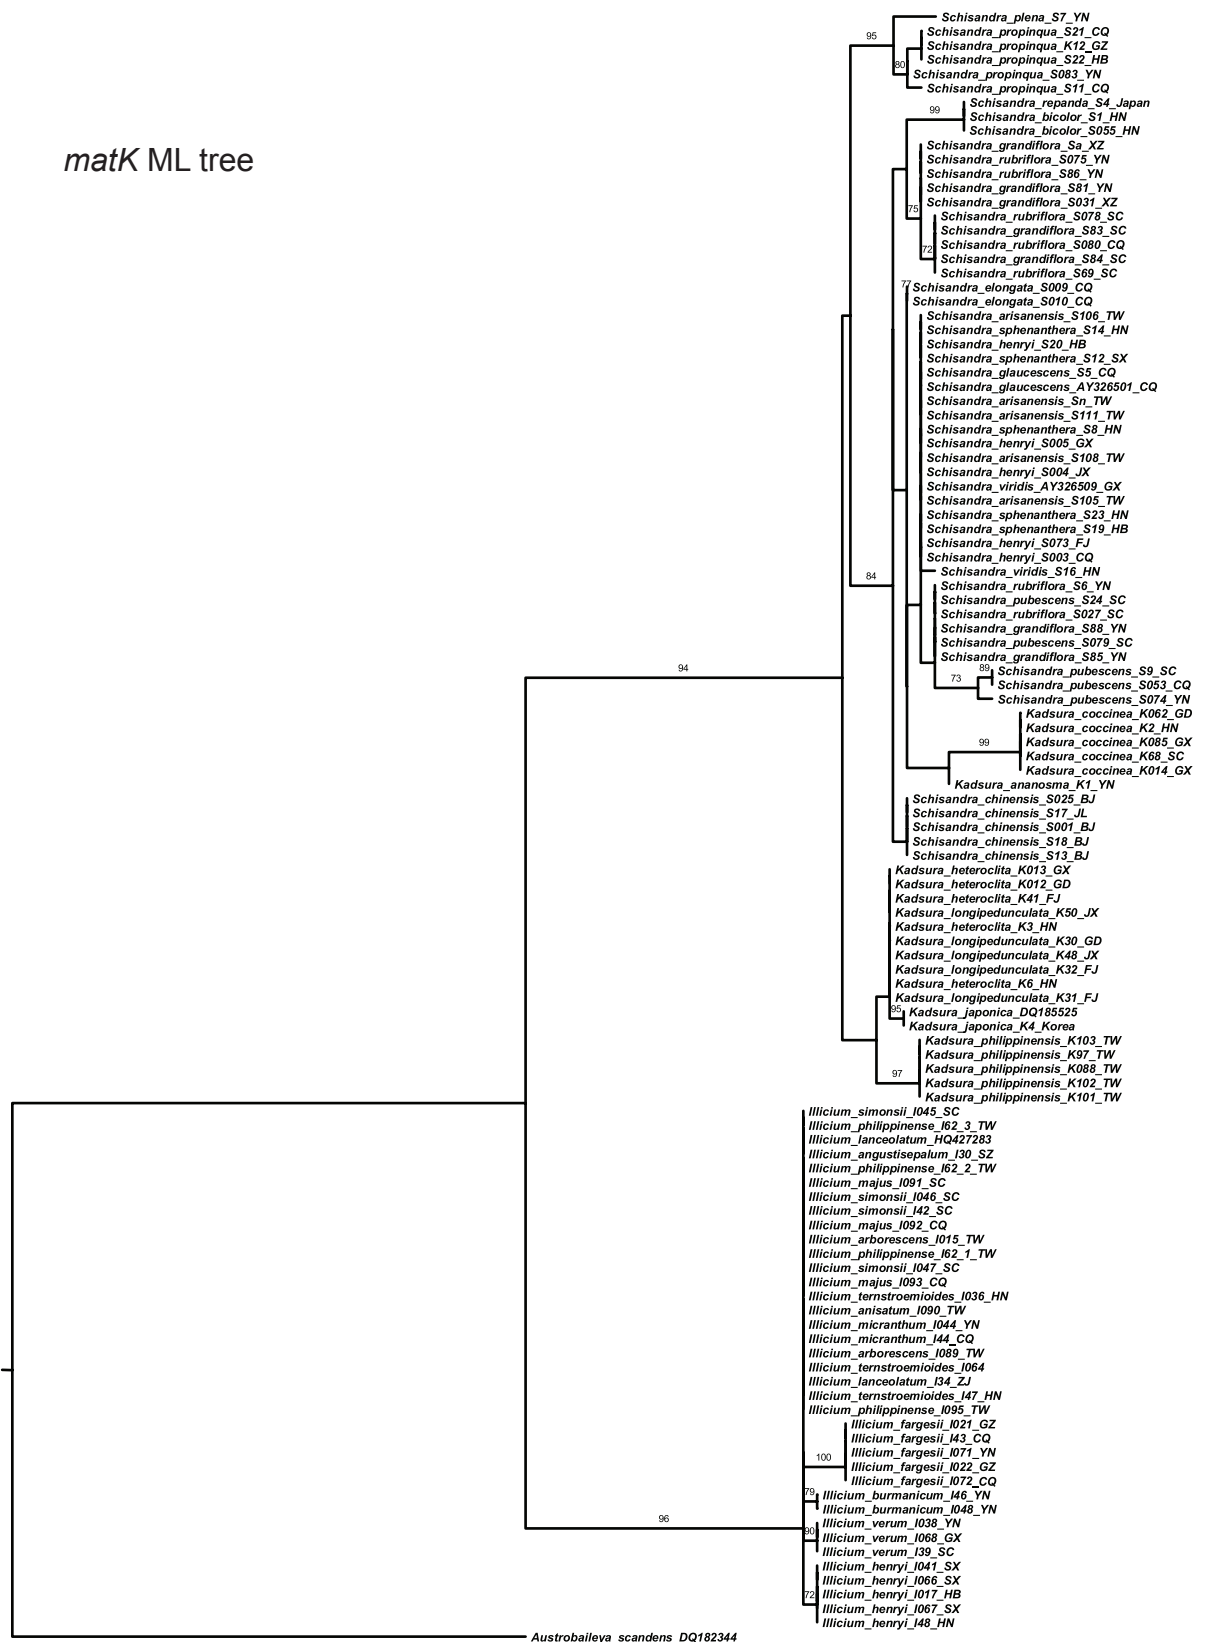

*rbcL* ML tree

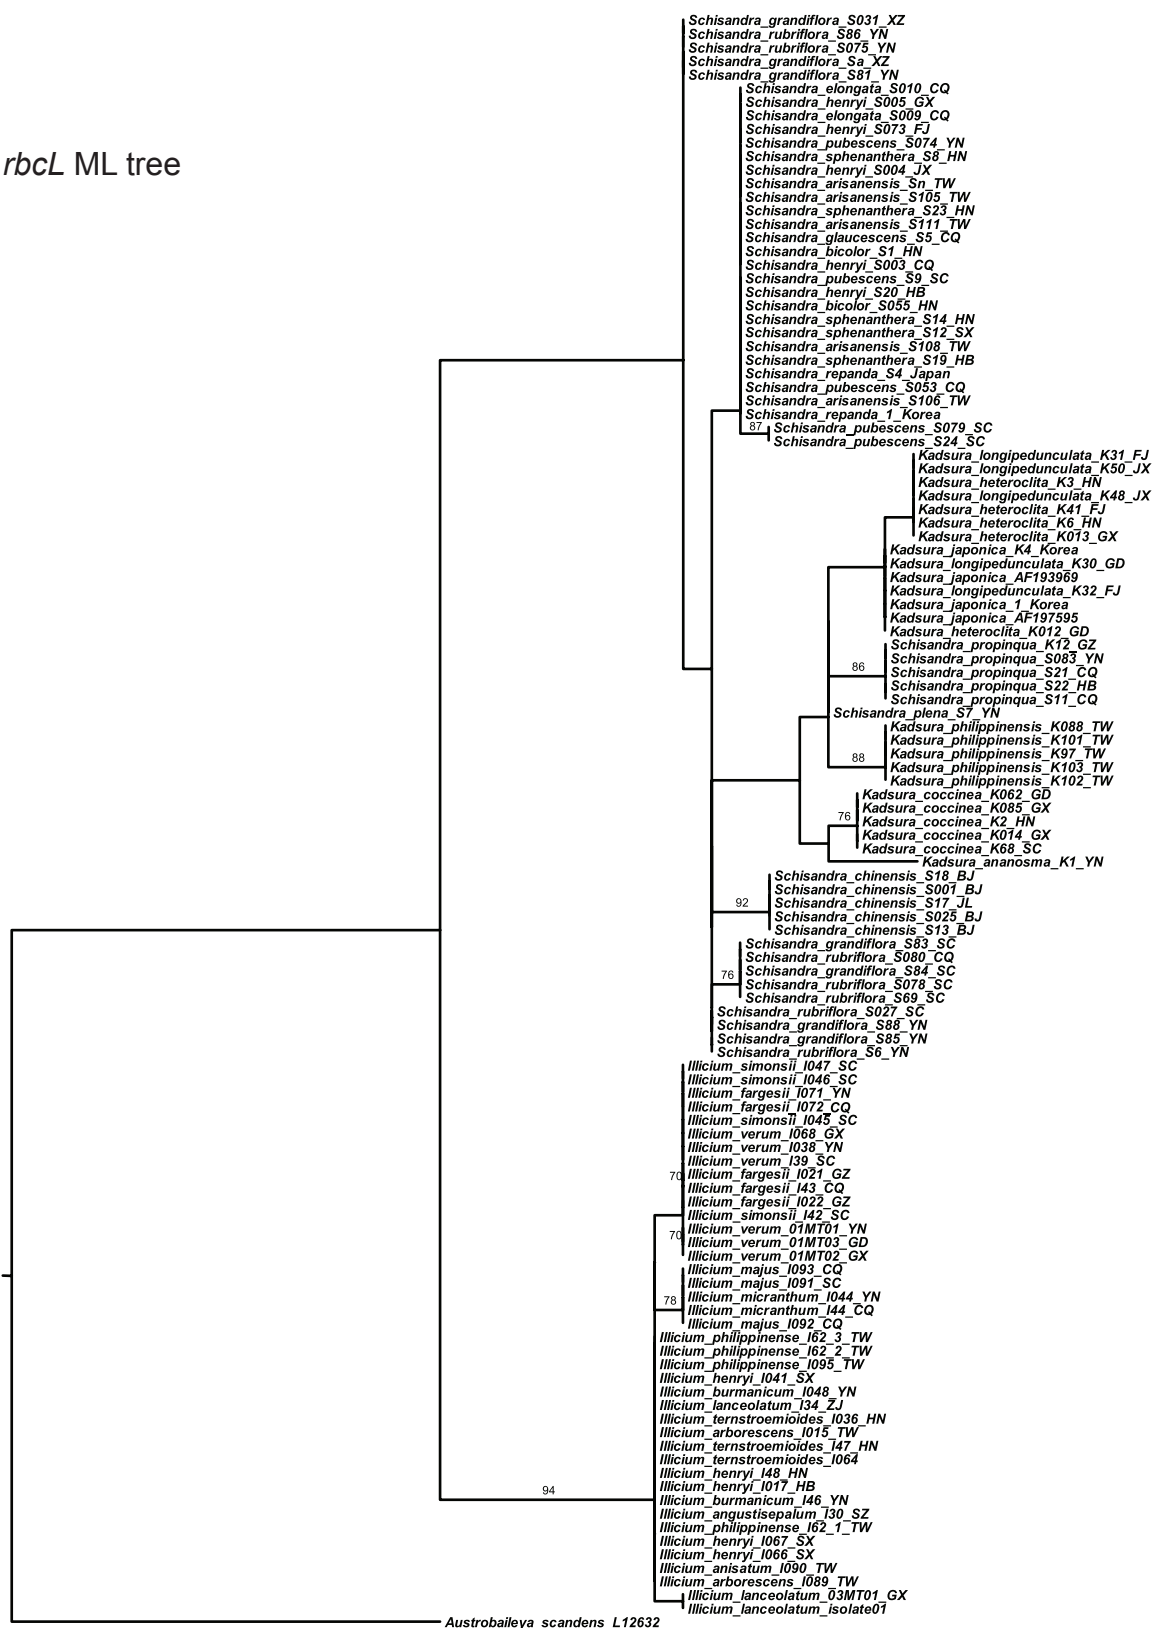

ITS-*trnH-psbA* ML tree

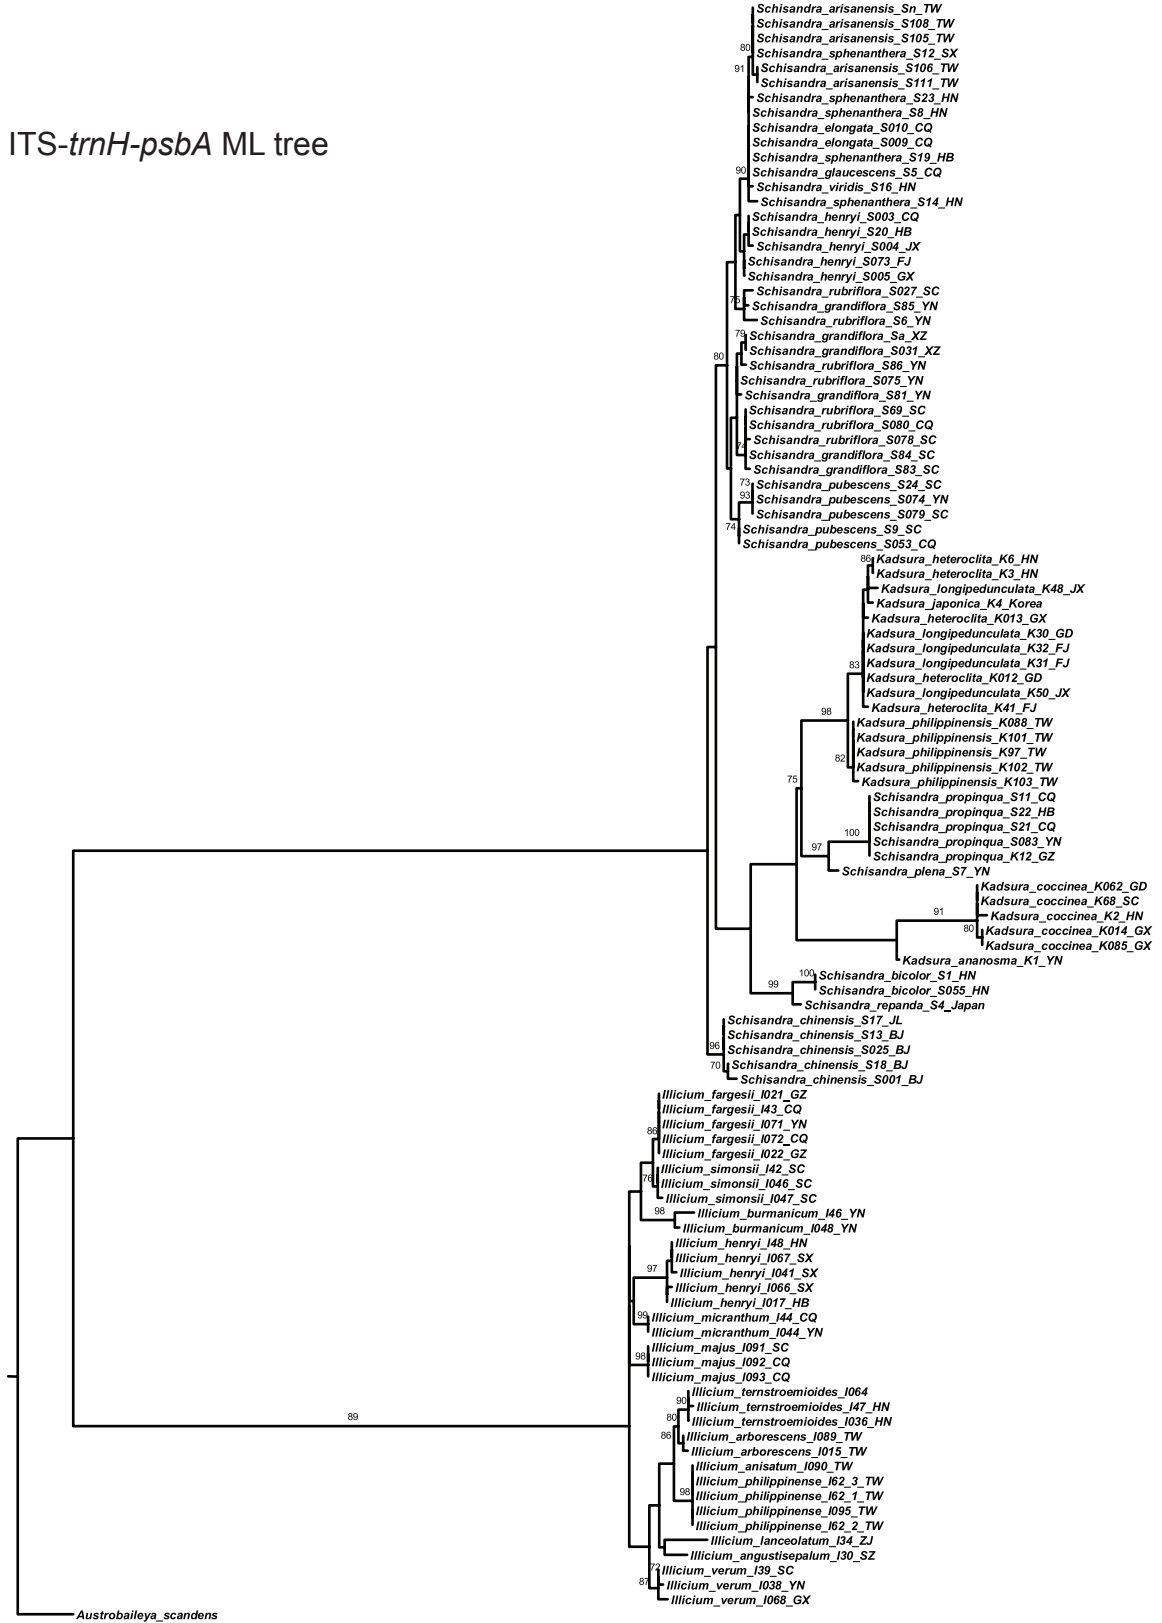

ITS-*matK* ML tree

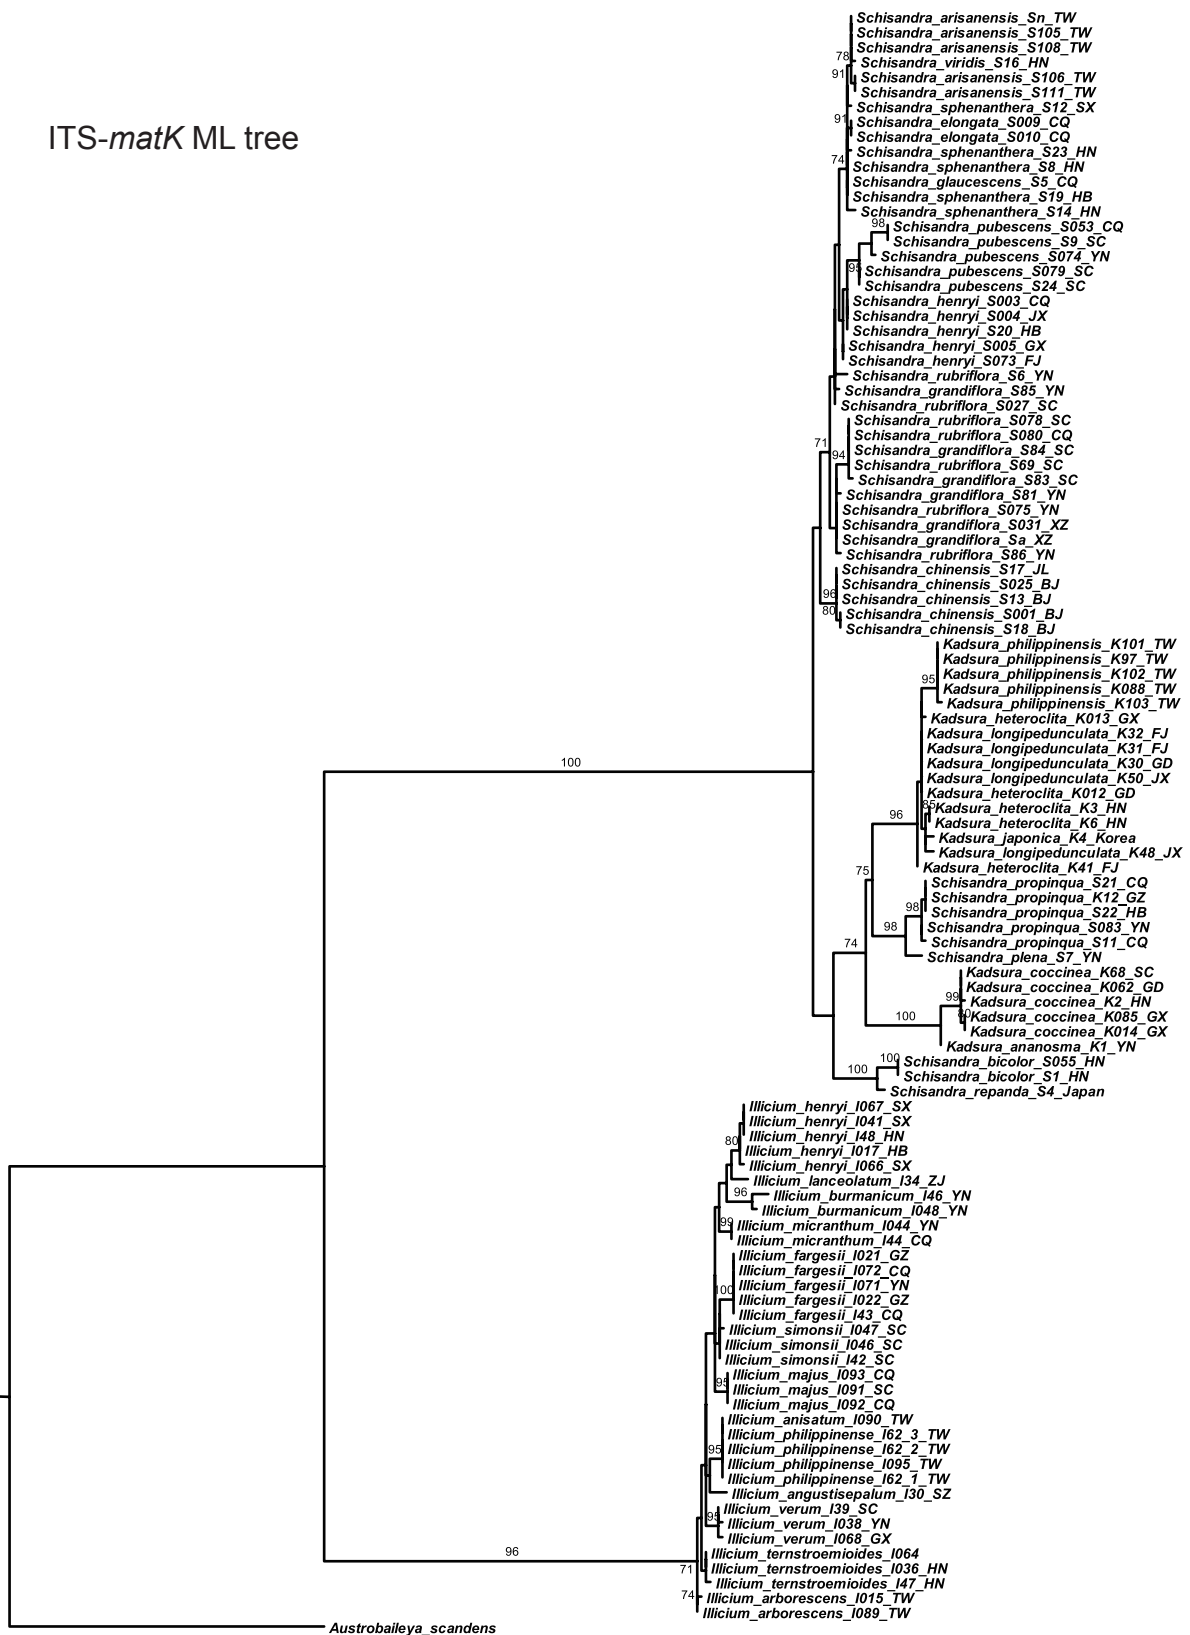



ITS-*rbcl* ML tree

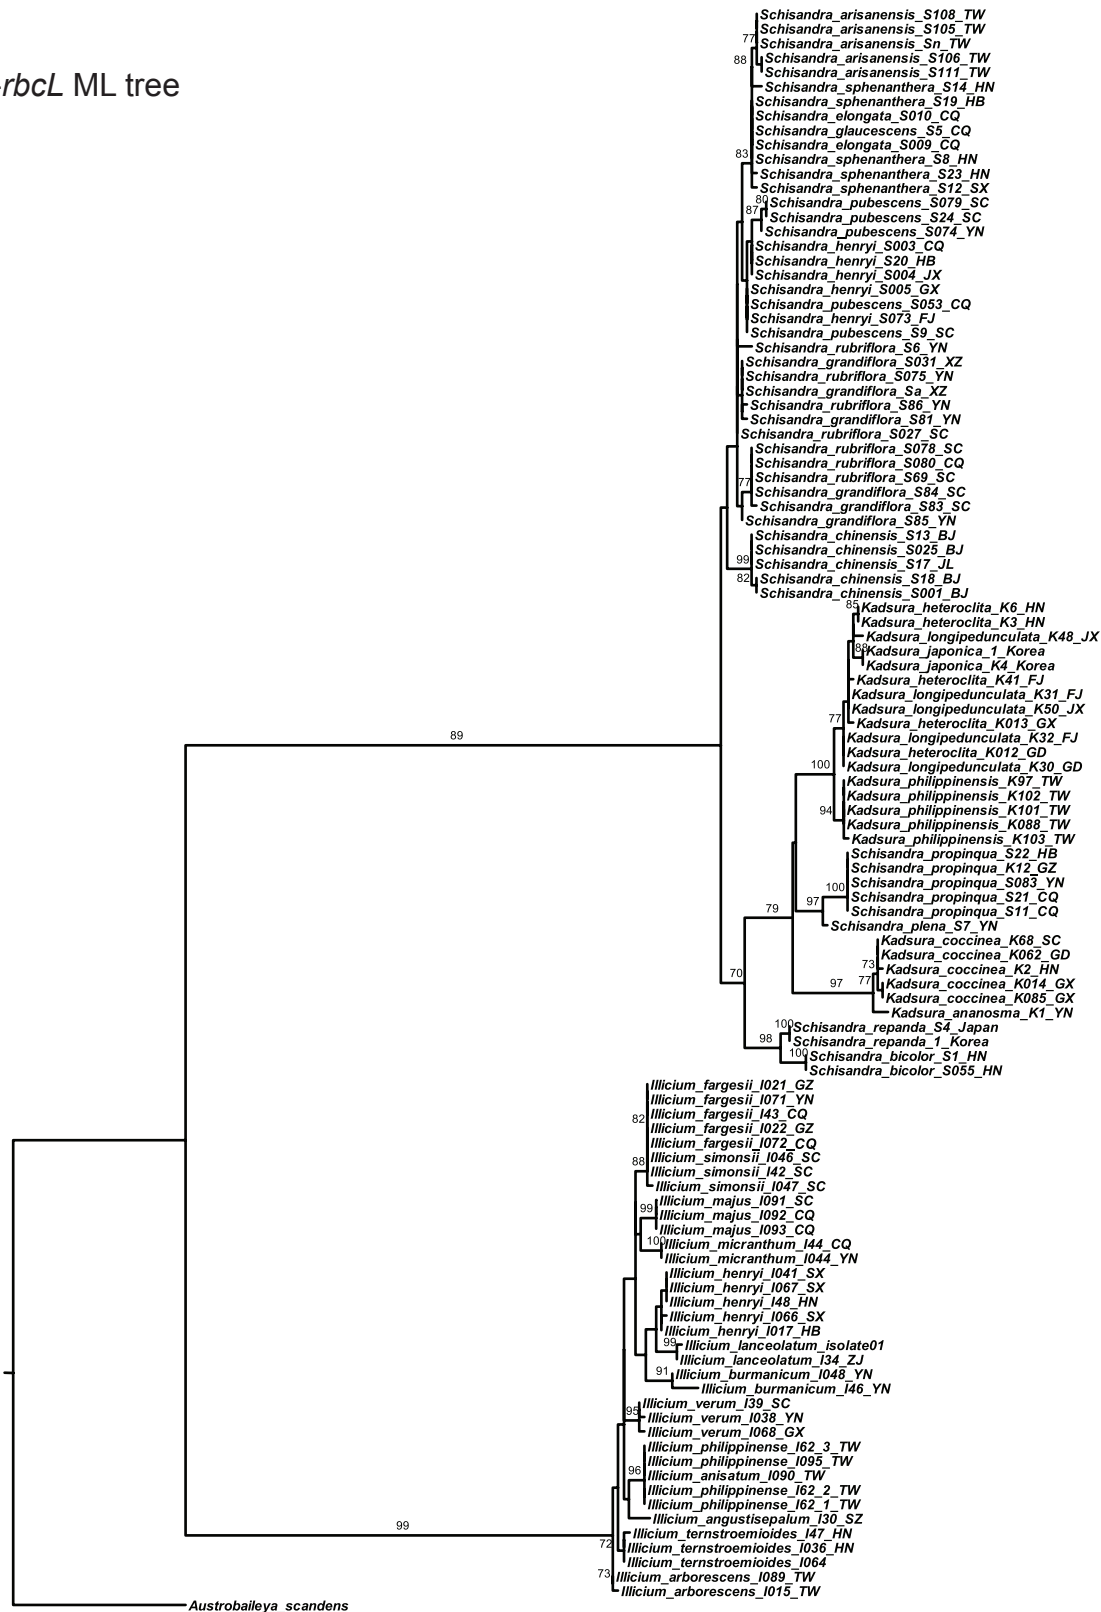

trnH-psbA-matK ML tree

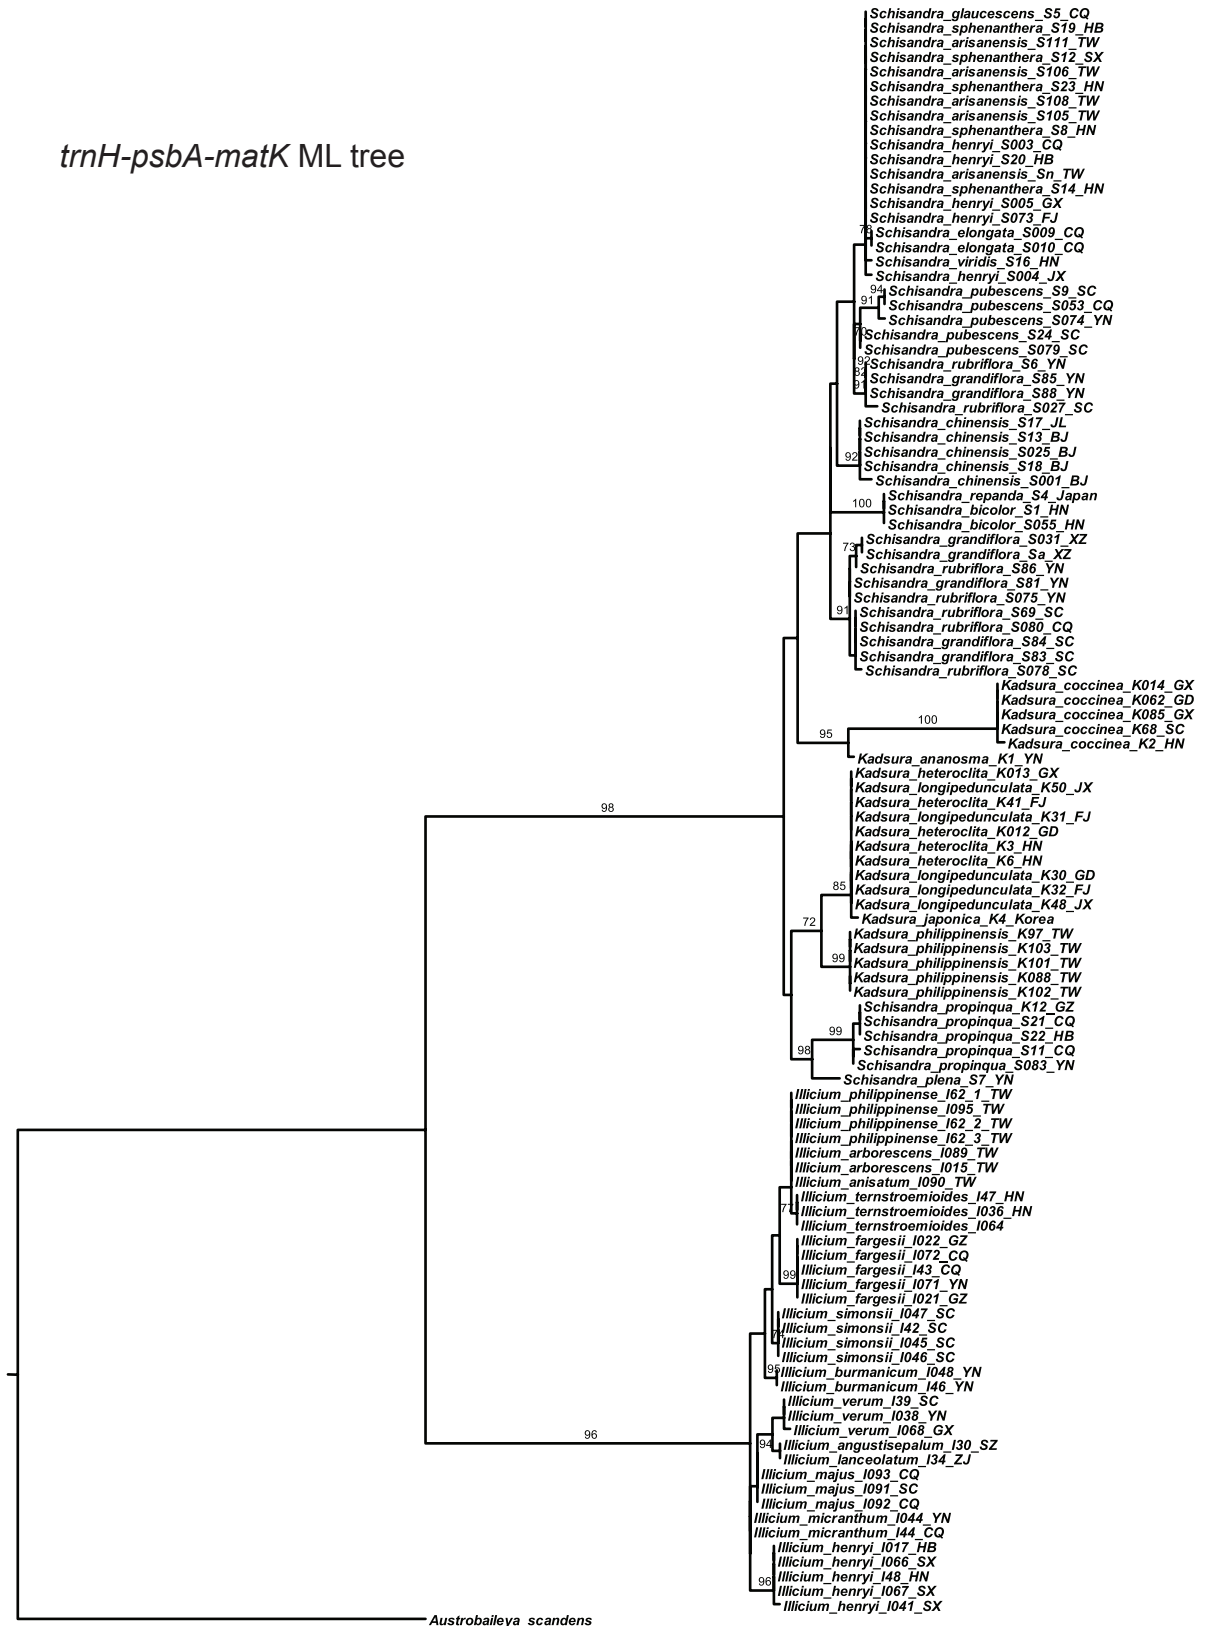

trnH-psbA-rbcL ML tree

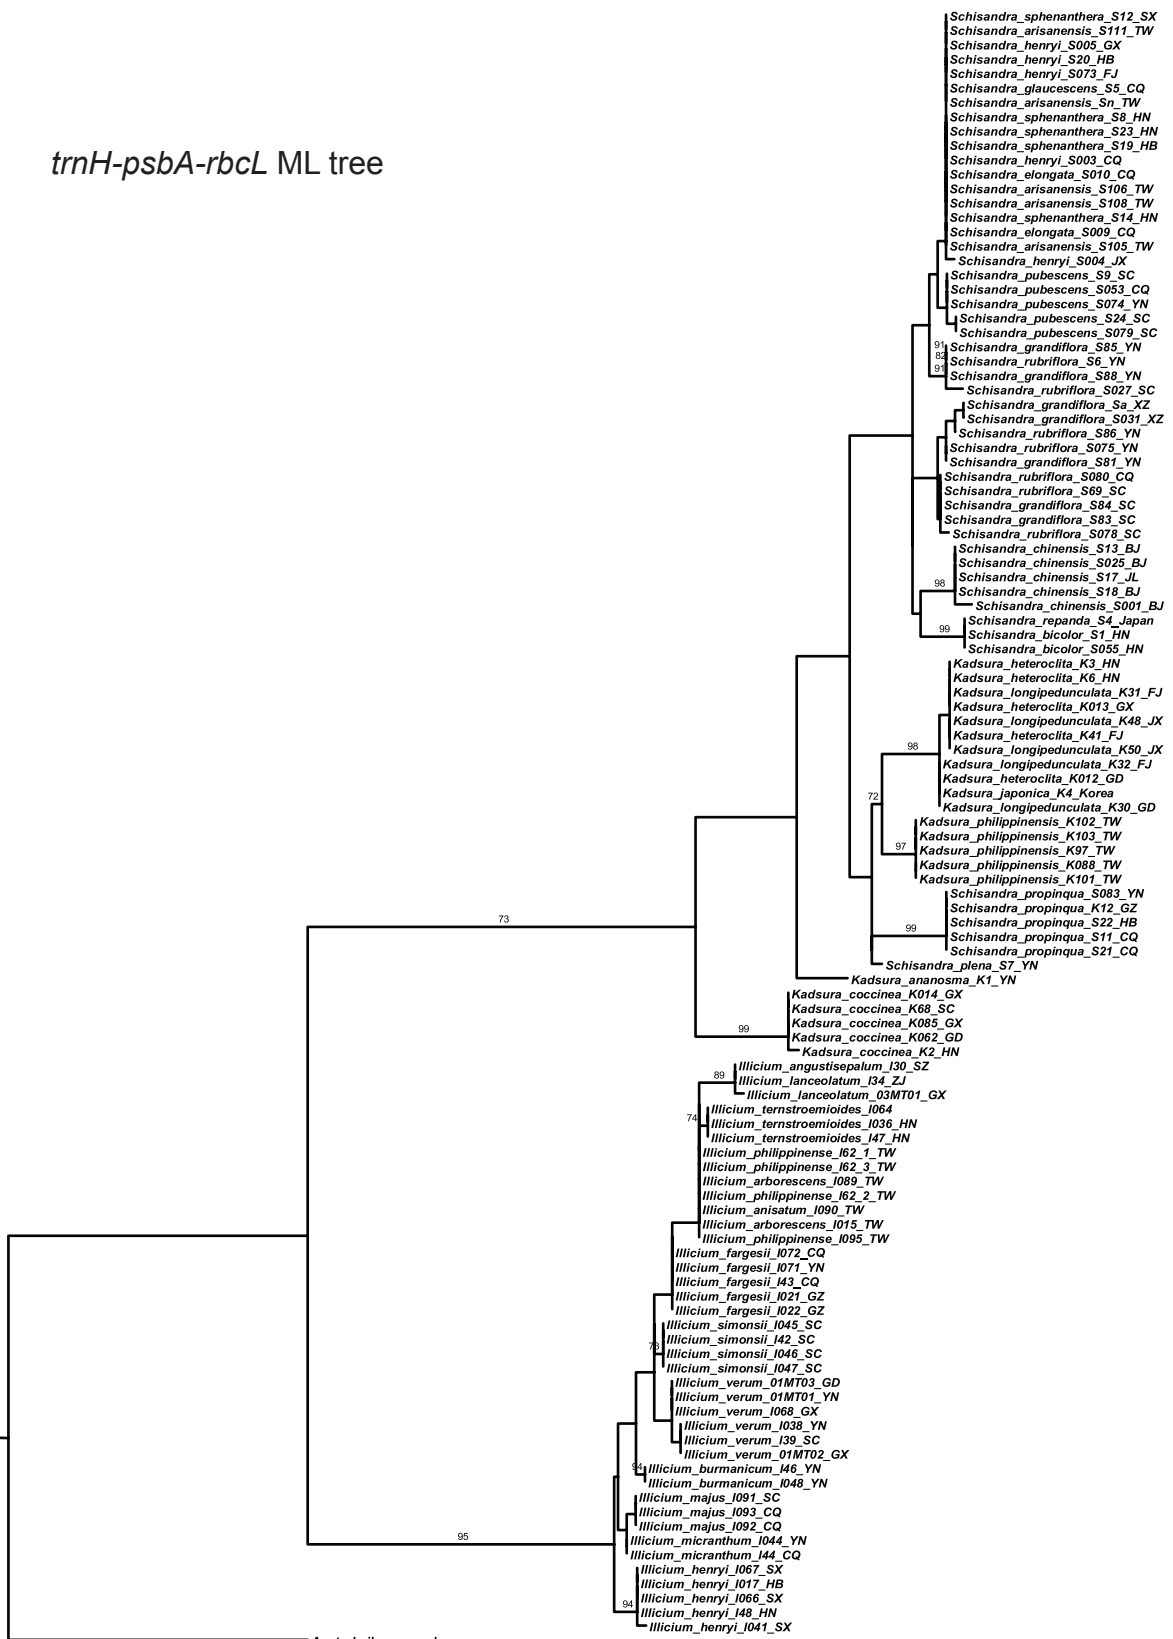

matK-rbcL ML tree

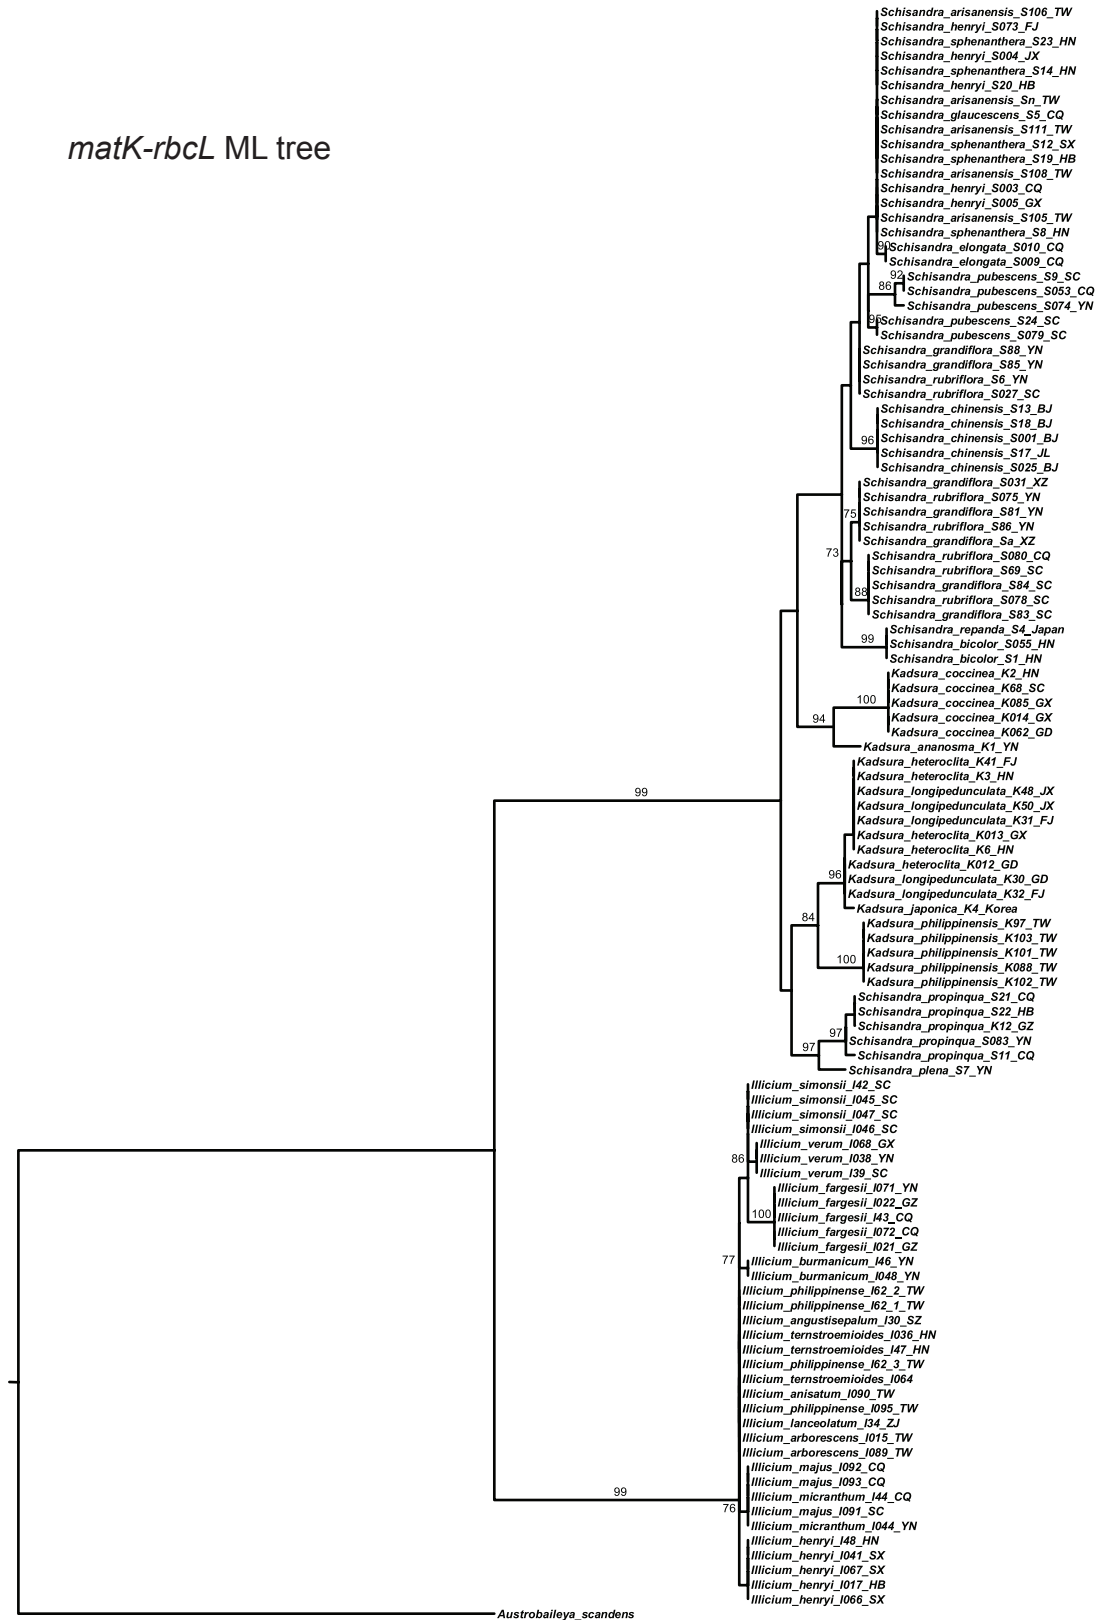

ITS-*trnH-psbA-matK* ML tree

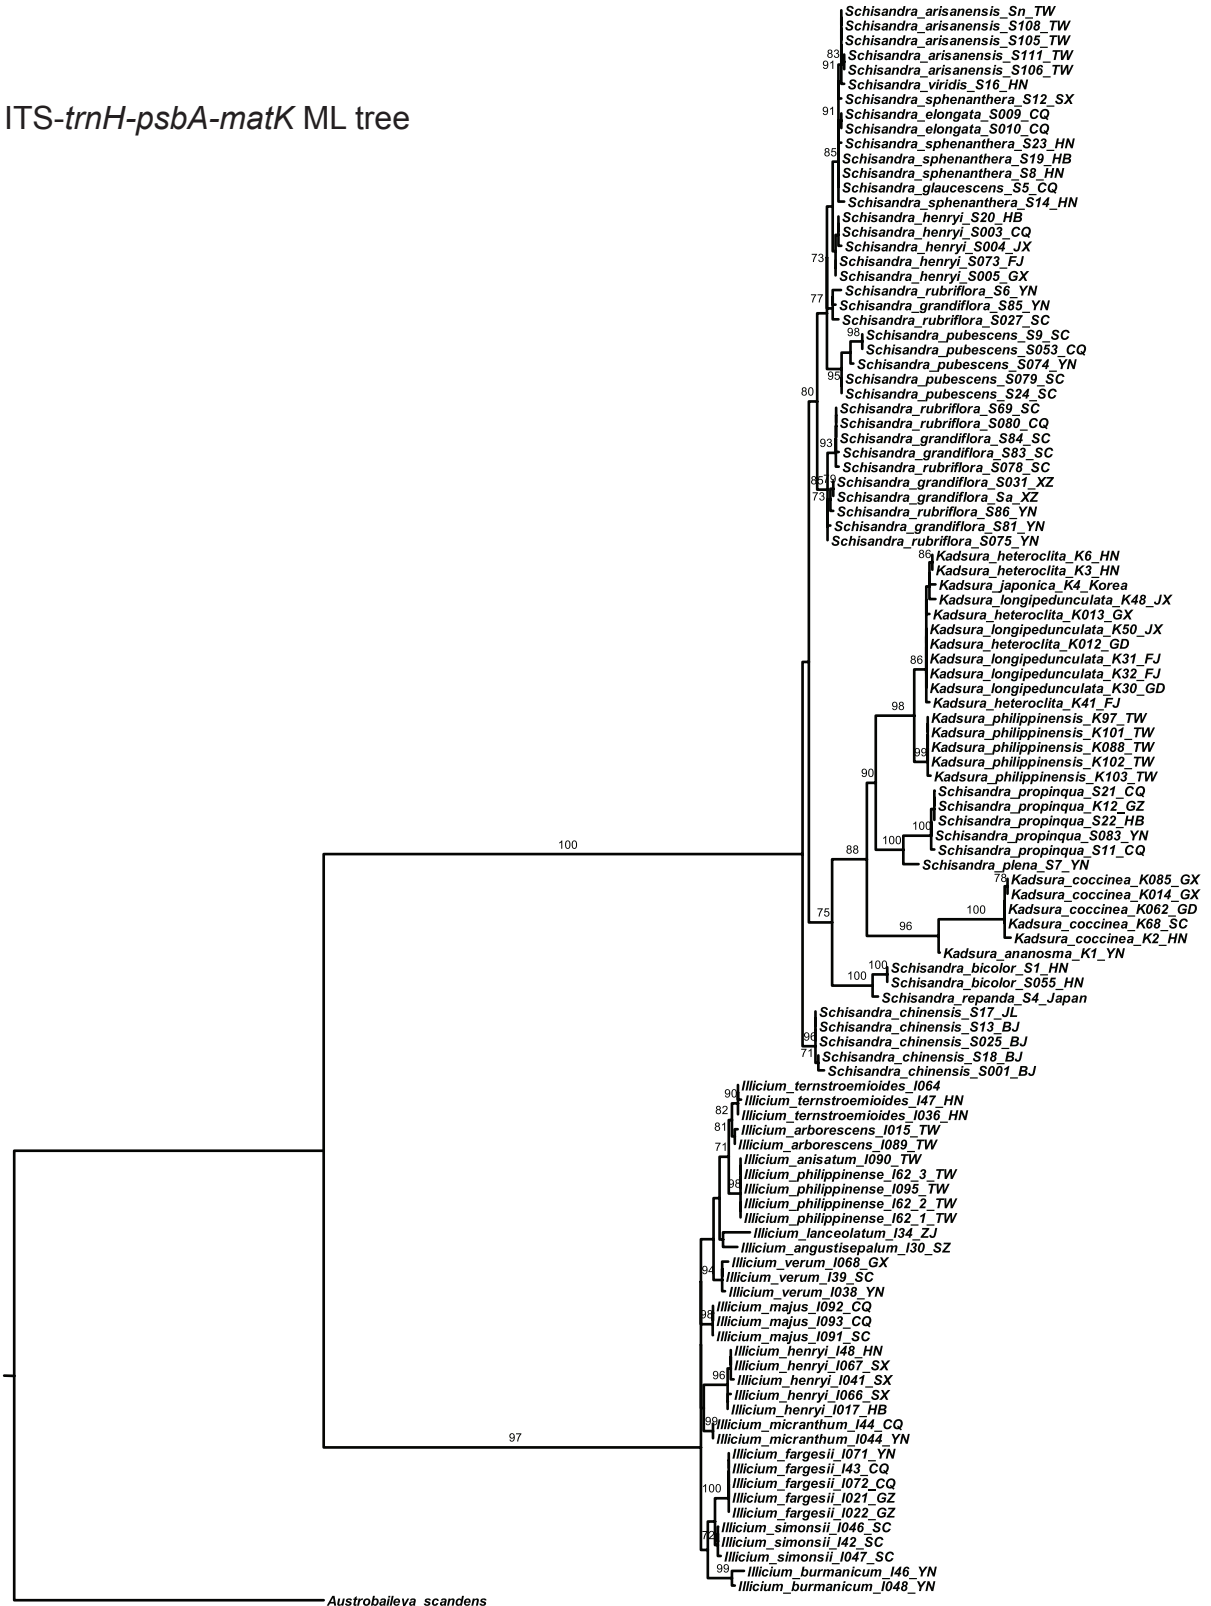

ITS-*rrnH-psbA-rbcL* ML tree

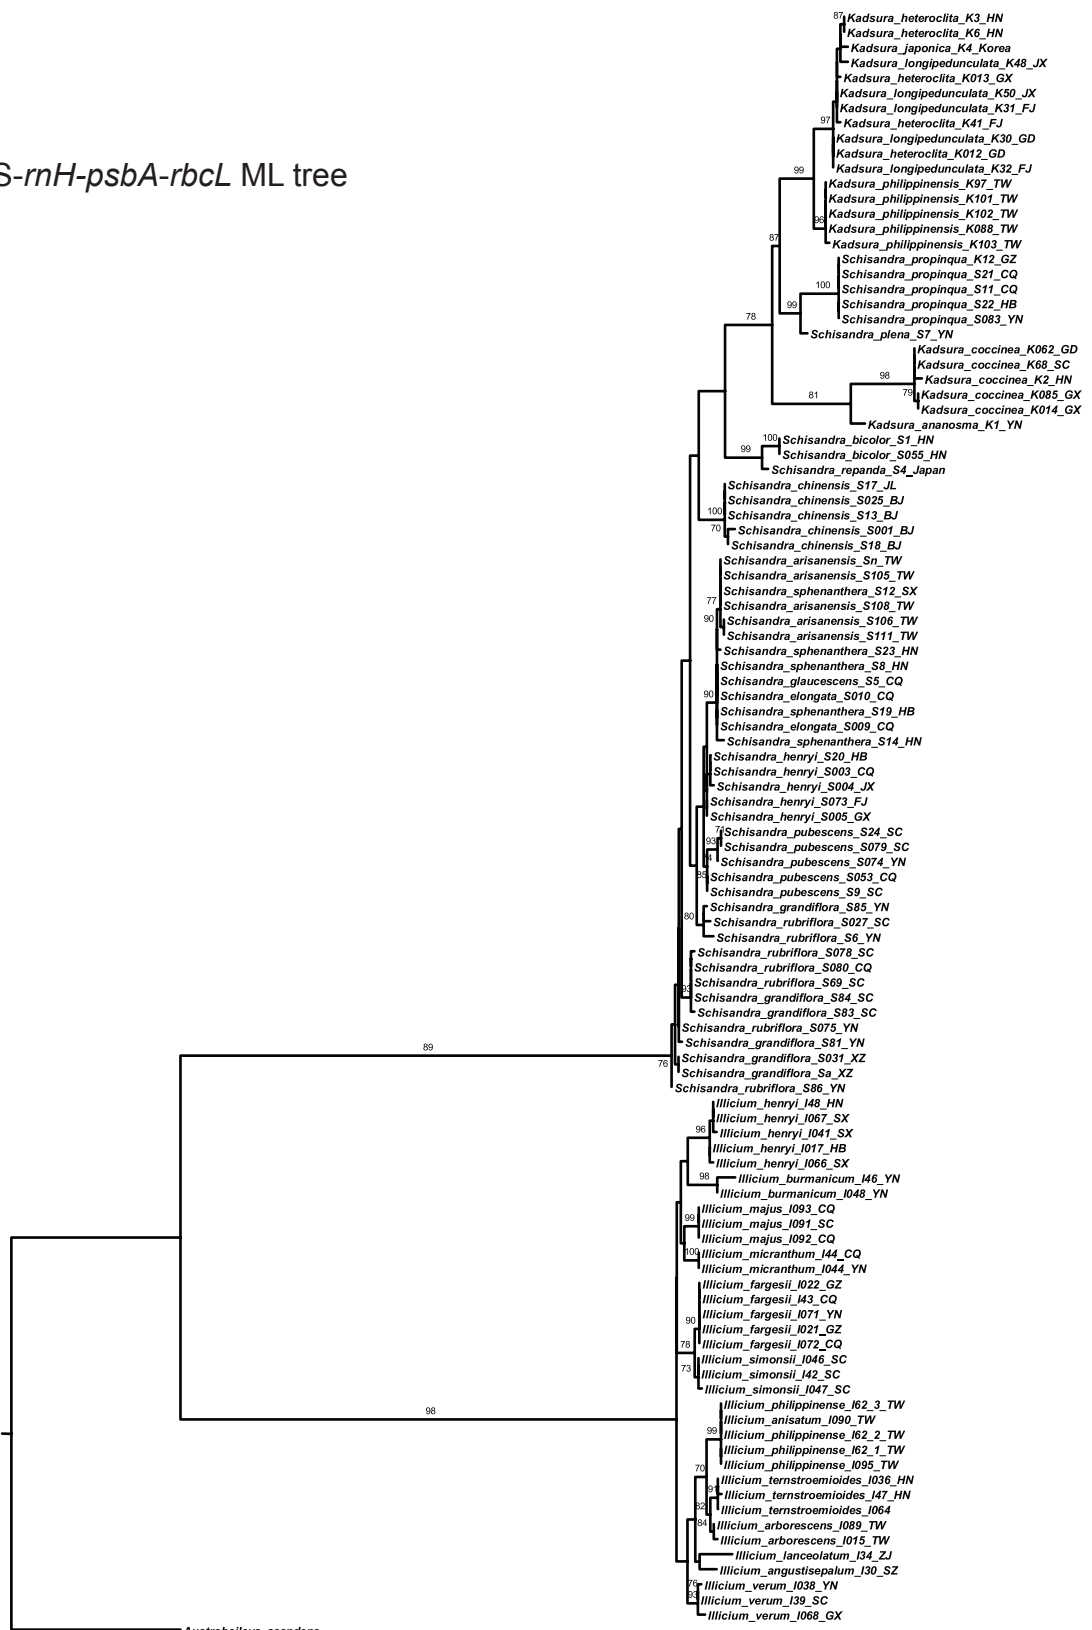

ITS-matK-rbcL ML tree

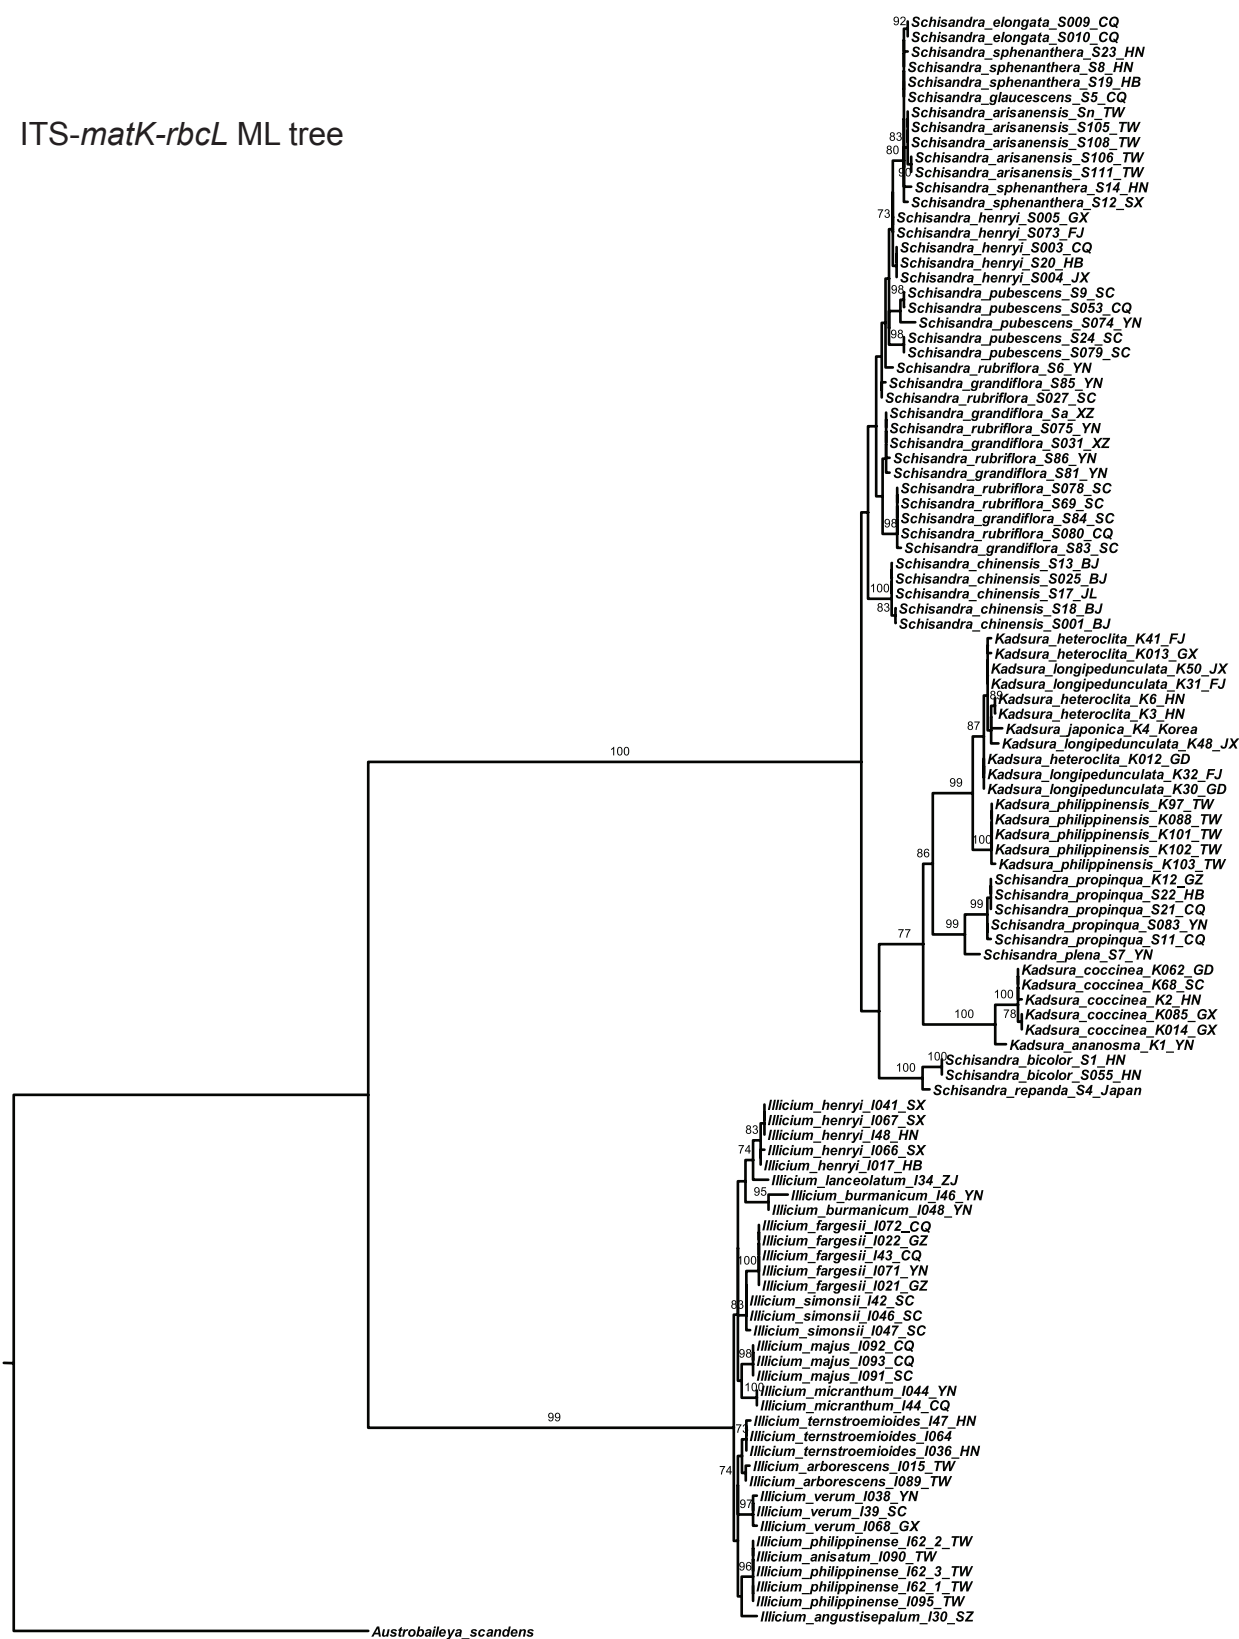

trnH-psbA-matK-rbcL ML tree

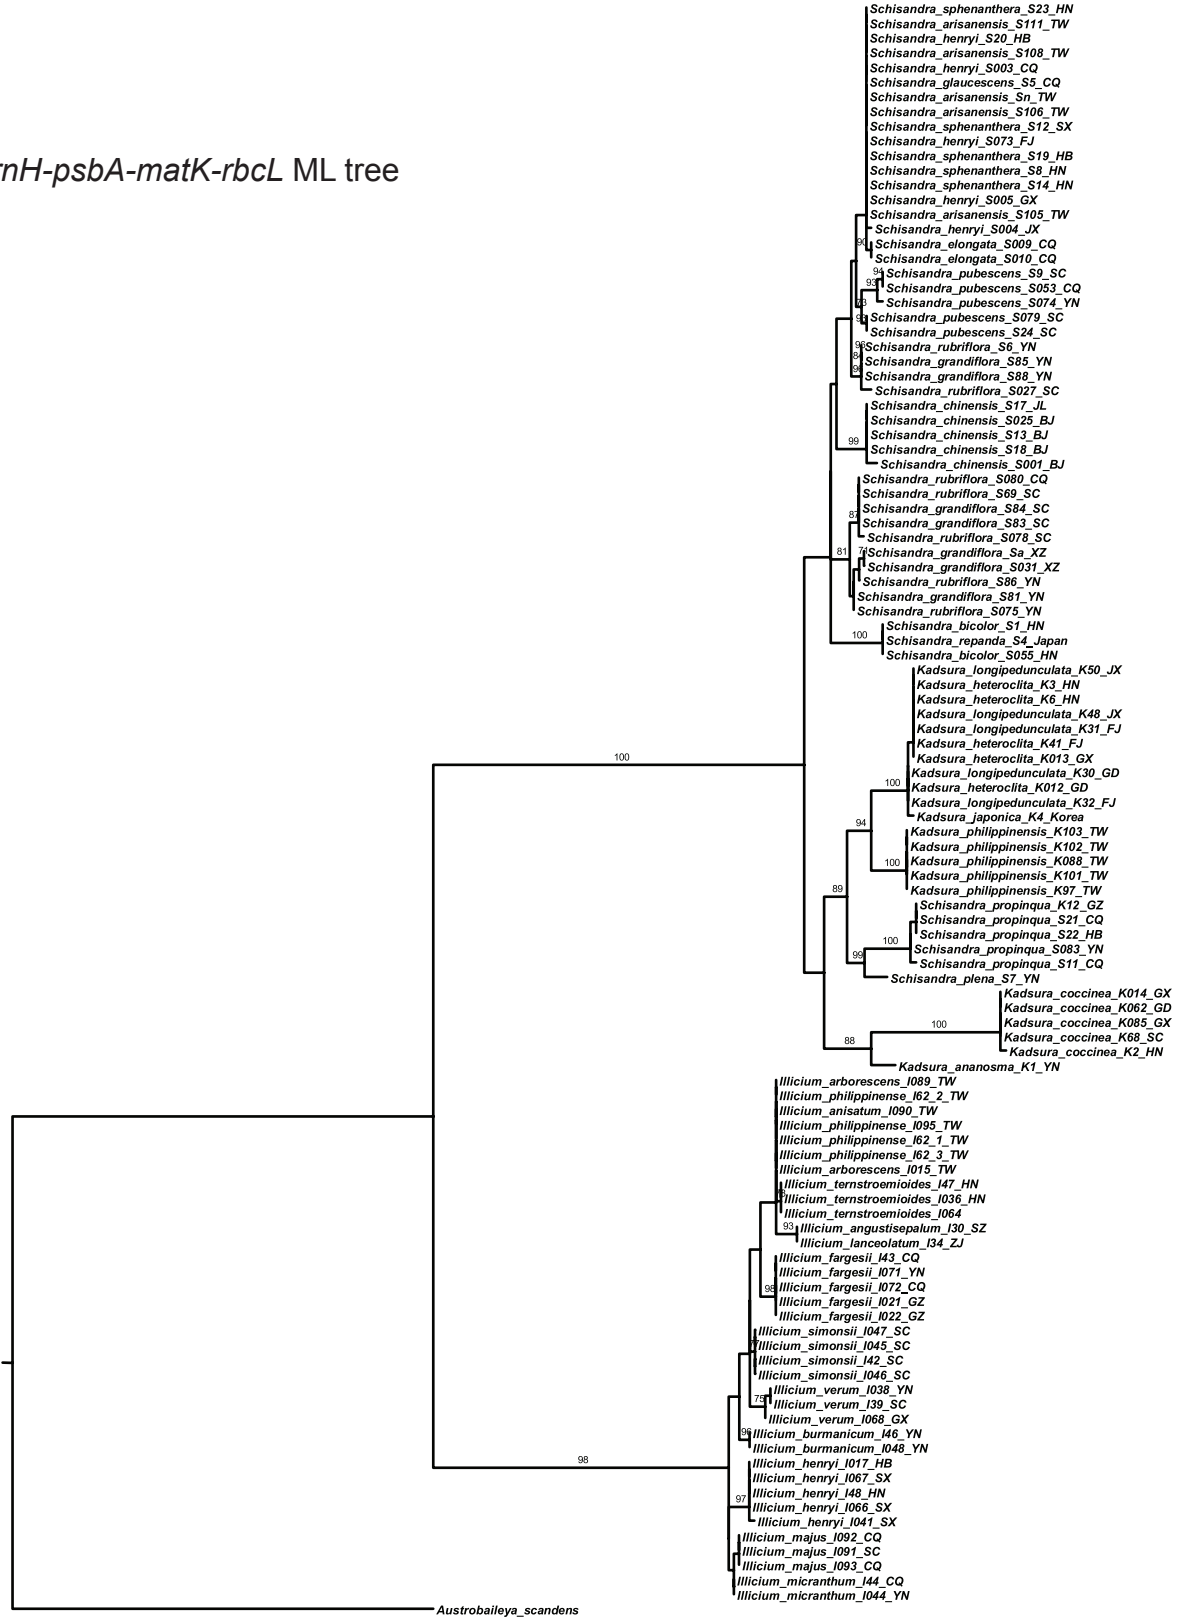



ITS-*trnH-psbA-matK-rbcL* ML tree

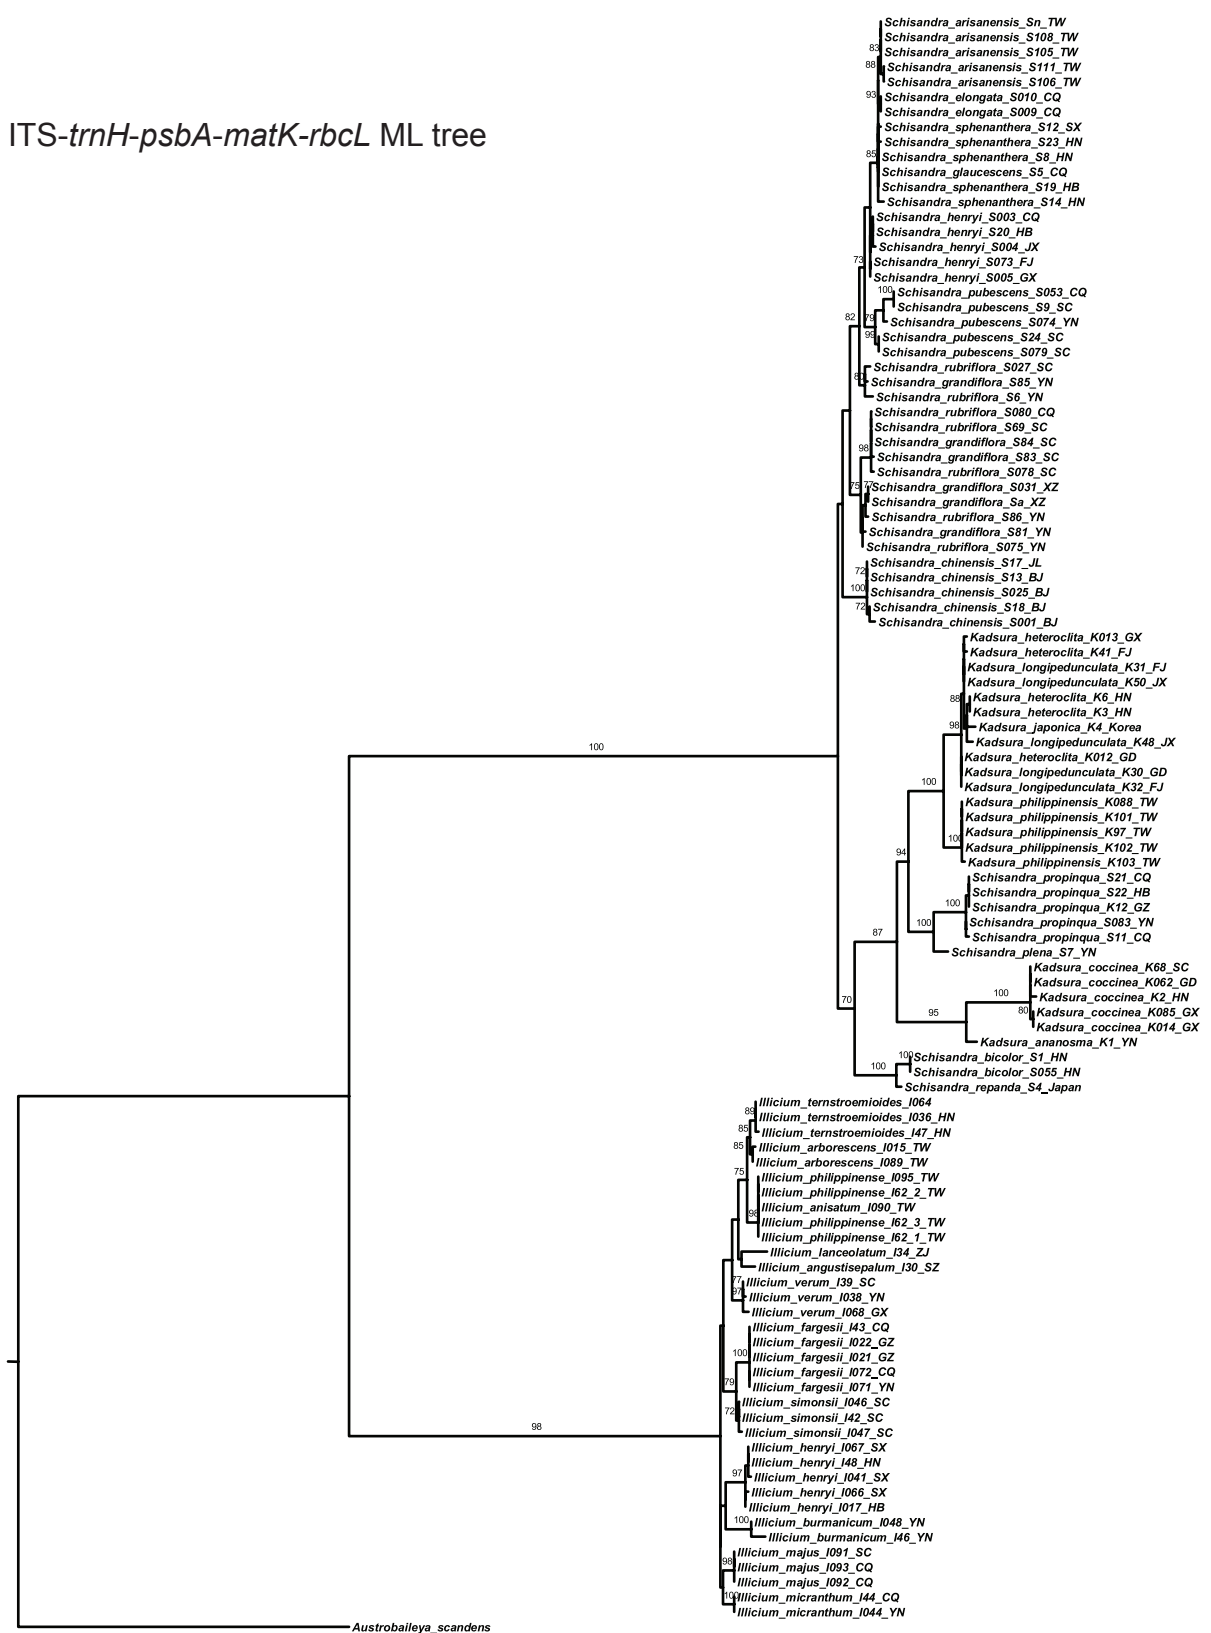

Supplement: pone.0125574.s001.pdf [file pone.0125574.s001.pdf]
