# Supplementary material for: Evaluation of Four Commonly Used DNA Barcoding Loci for Chinese Medicinal Plants of the Family Schisandraceae
Source: PubMed Central journal article supplement (PMC4418597; doi:10.1371/journal.pone.0125574), 2015-05-04

ITS1 BI tree

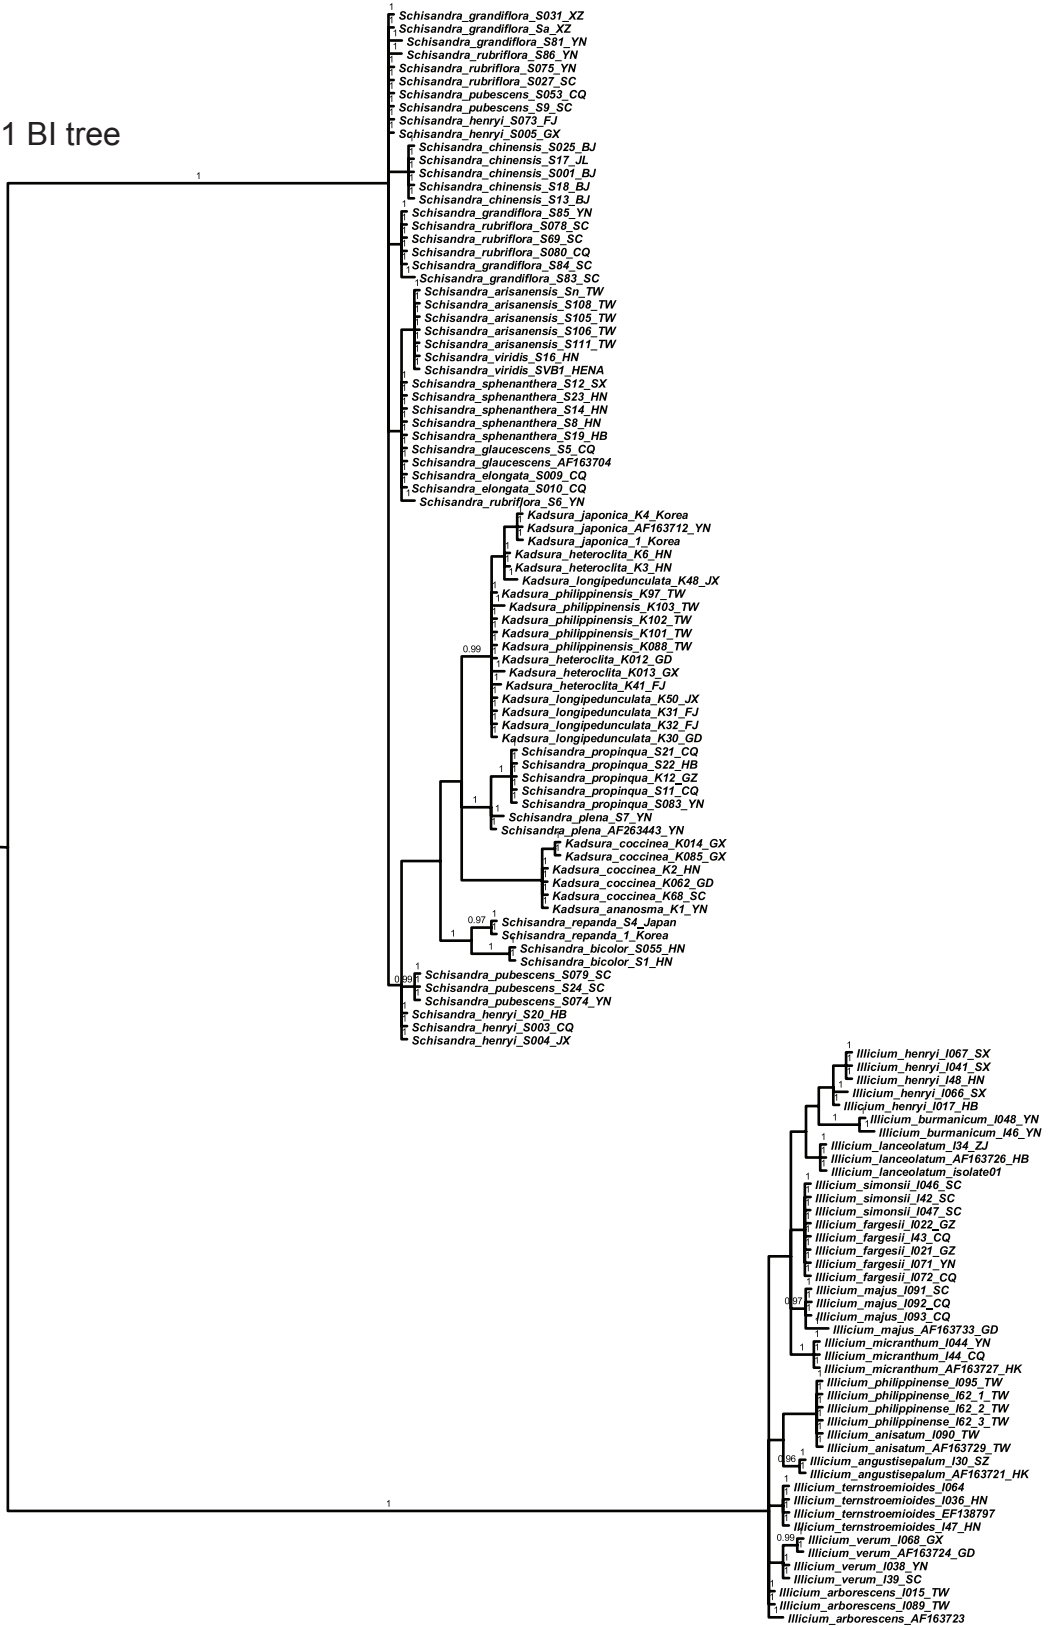

ITS2 BI tree

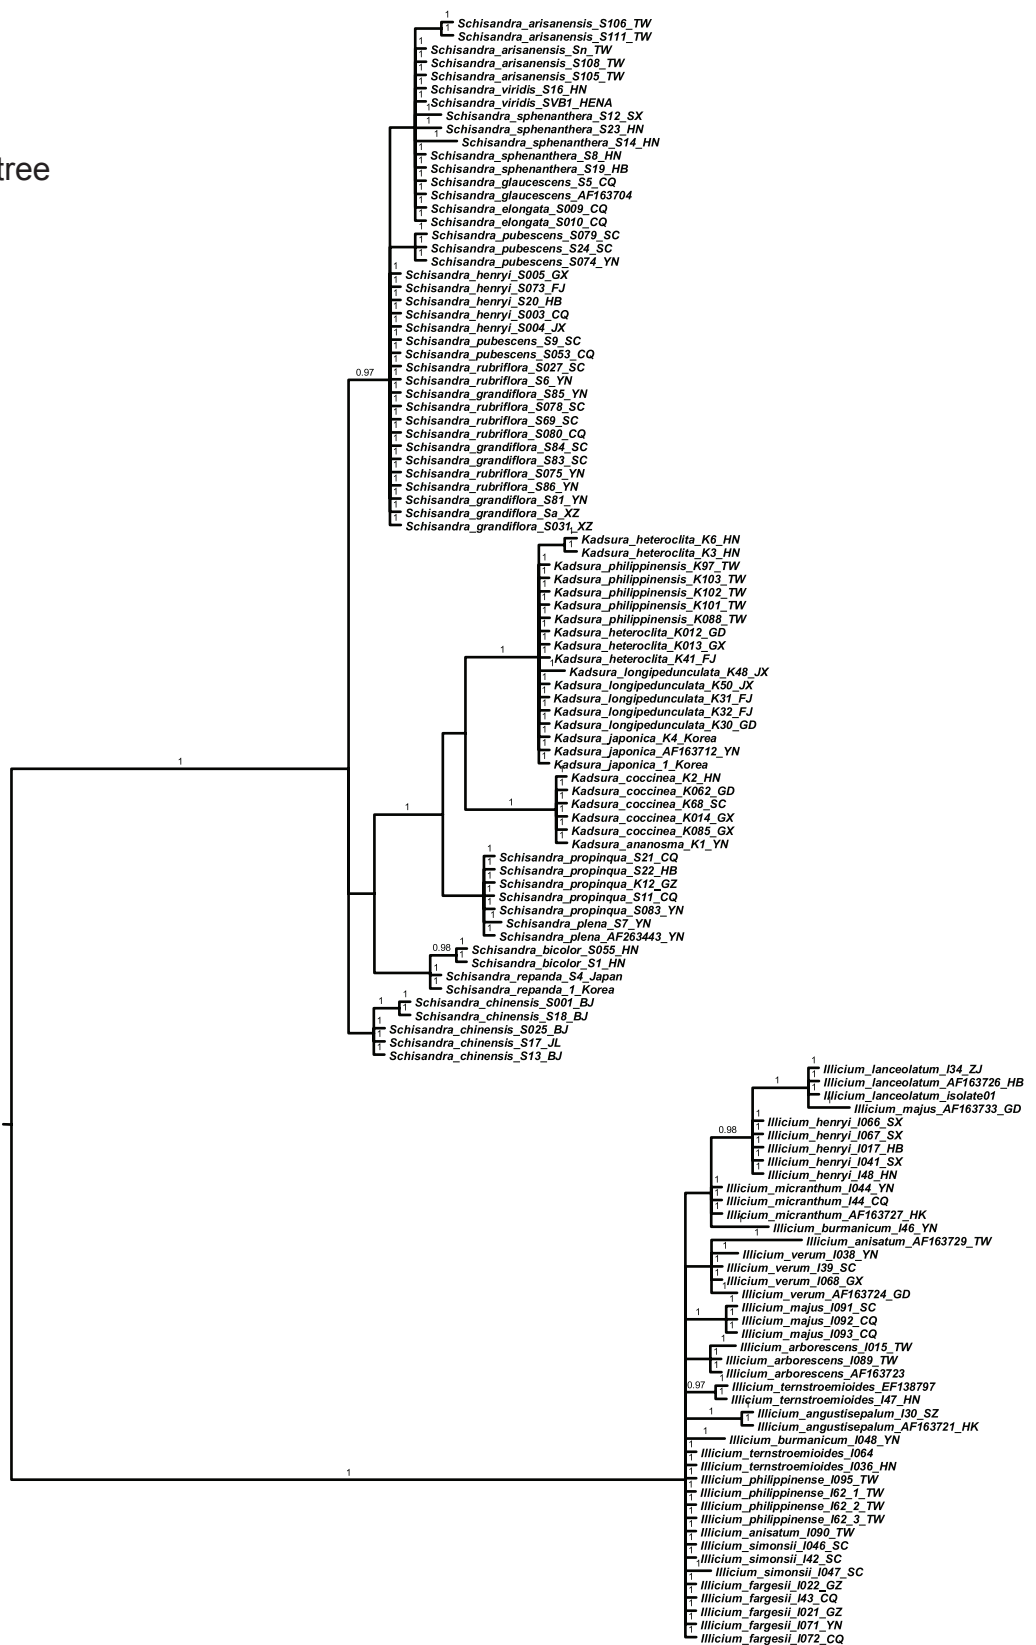

ITS BI tree

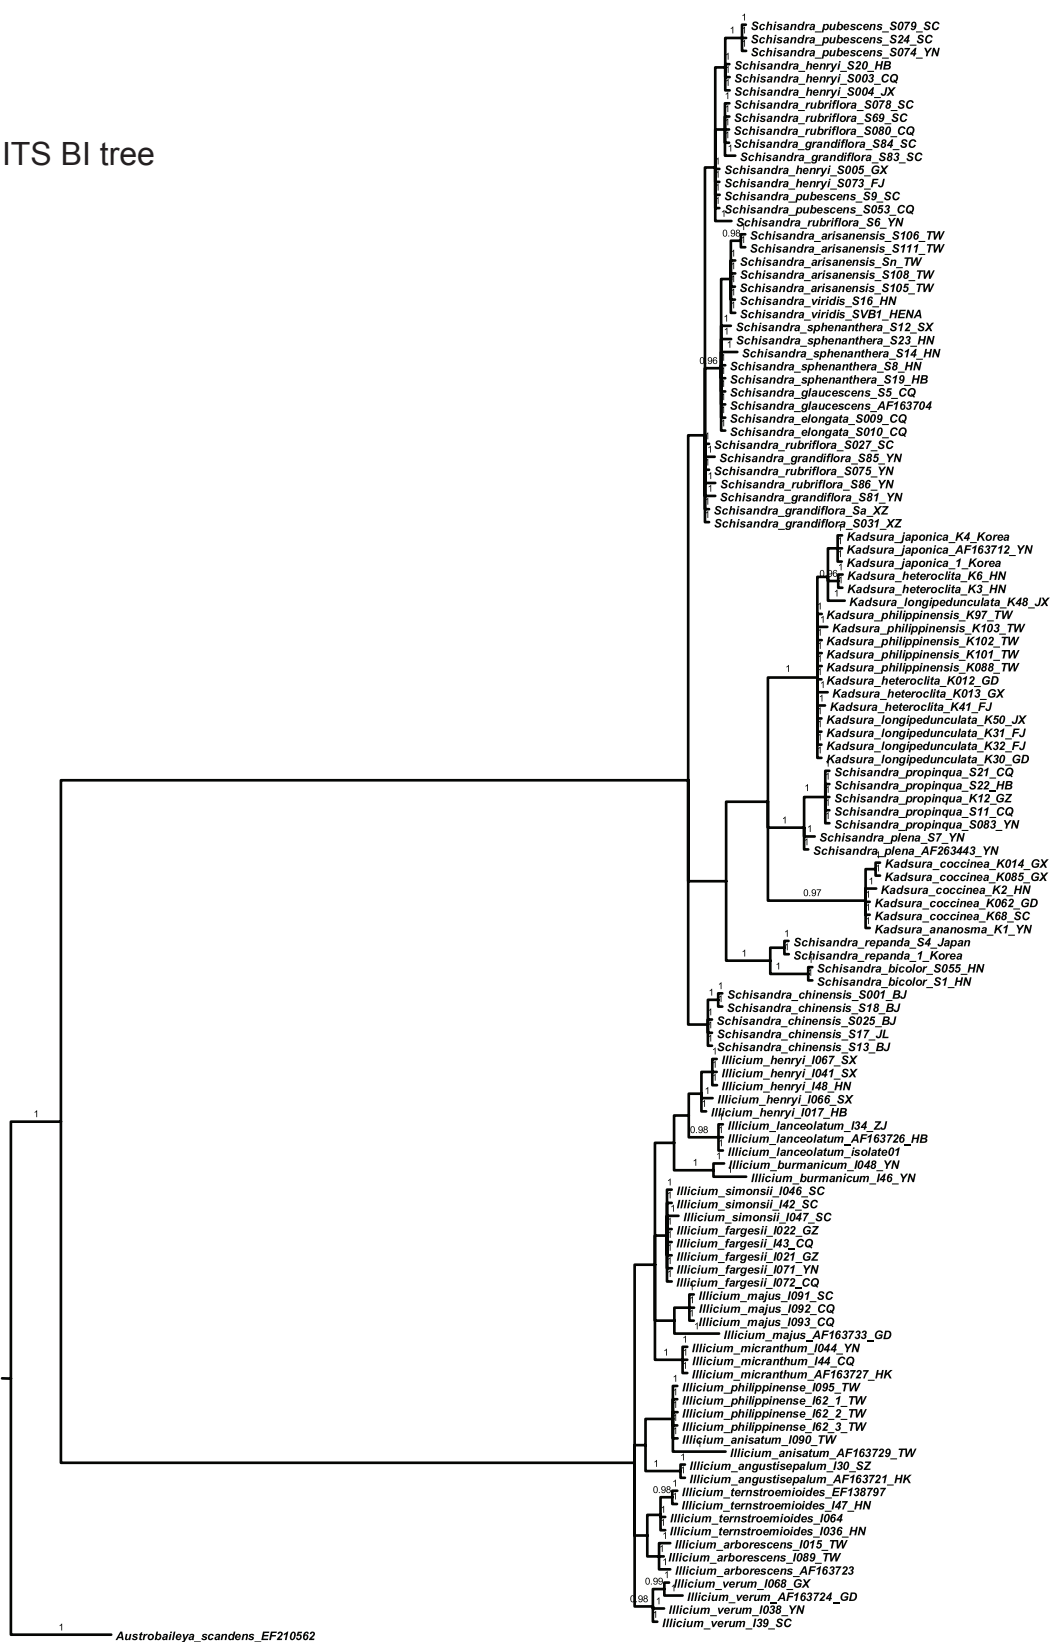

trnH-psbA BI tree

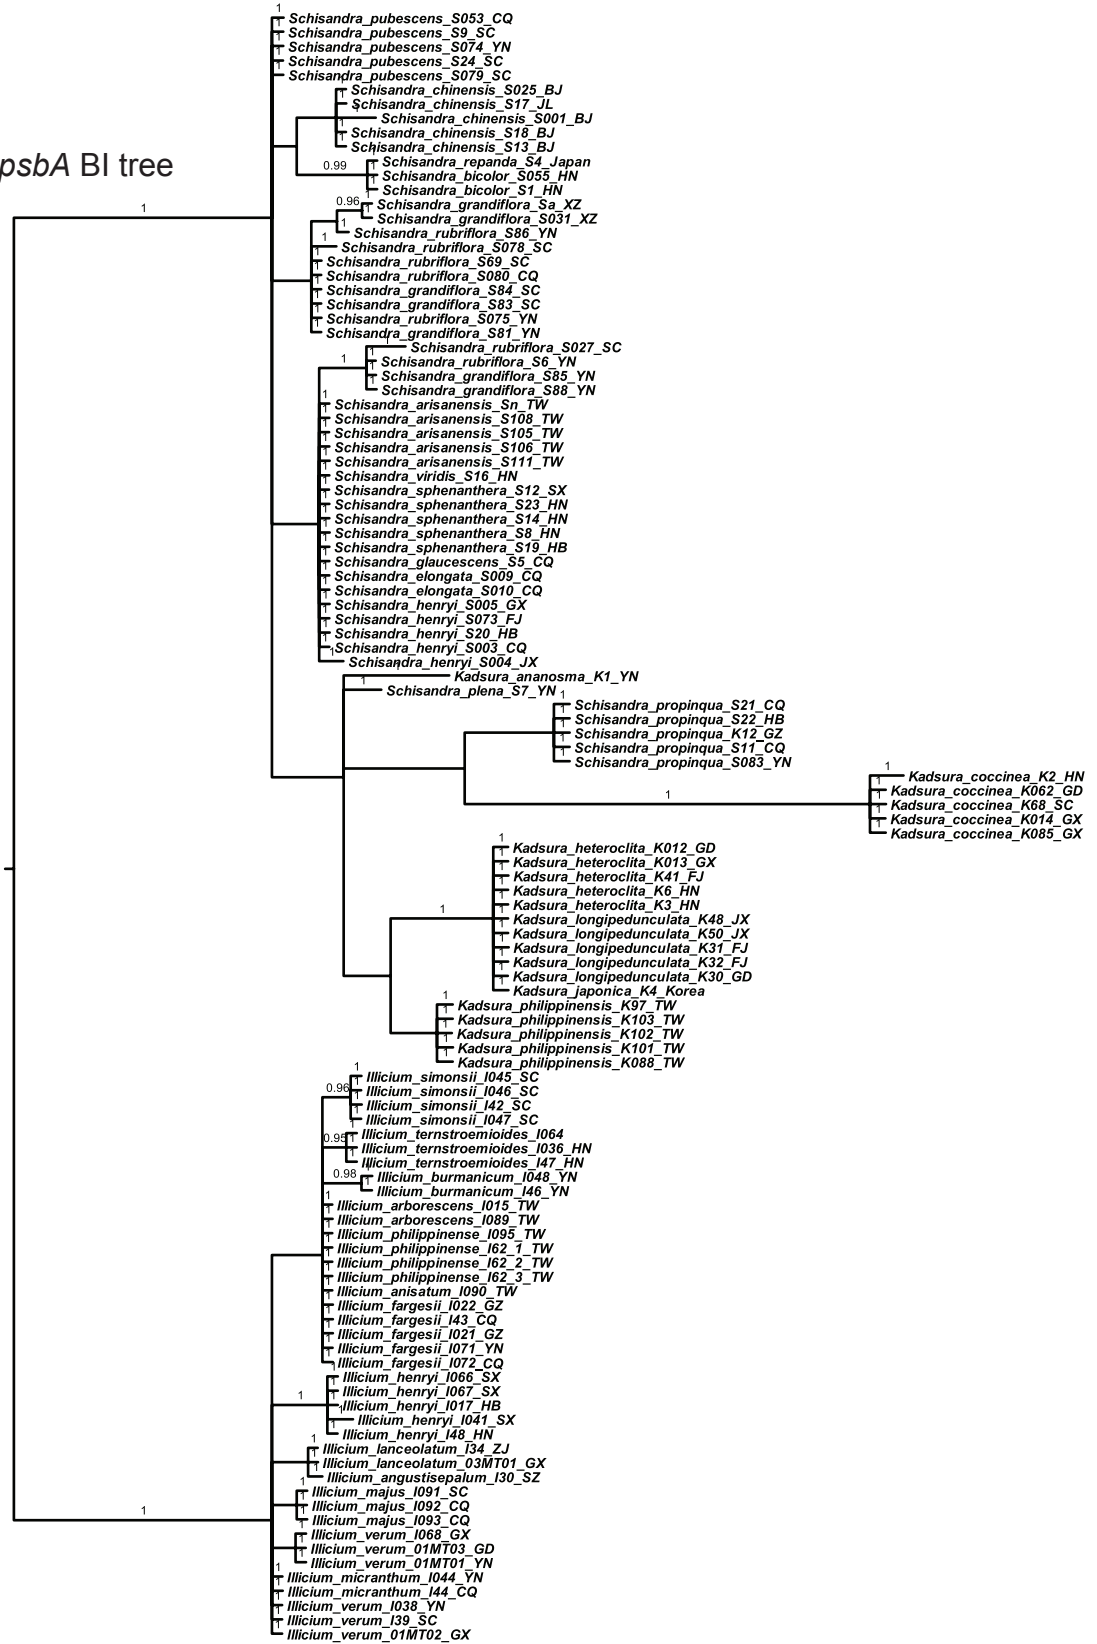

matK BI tree

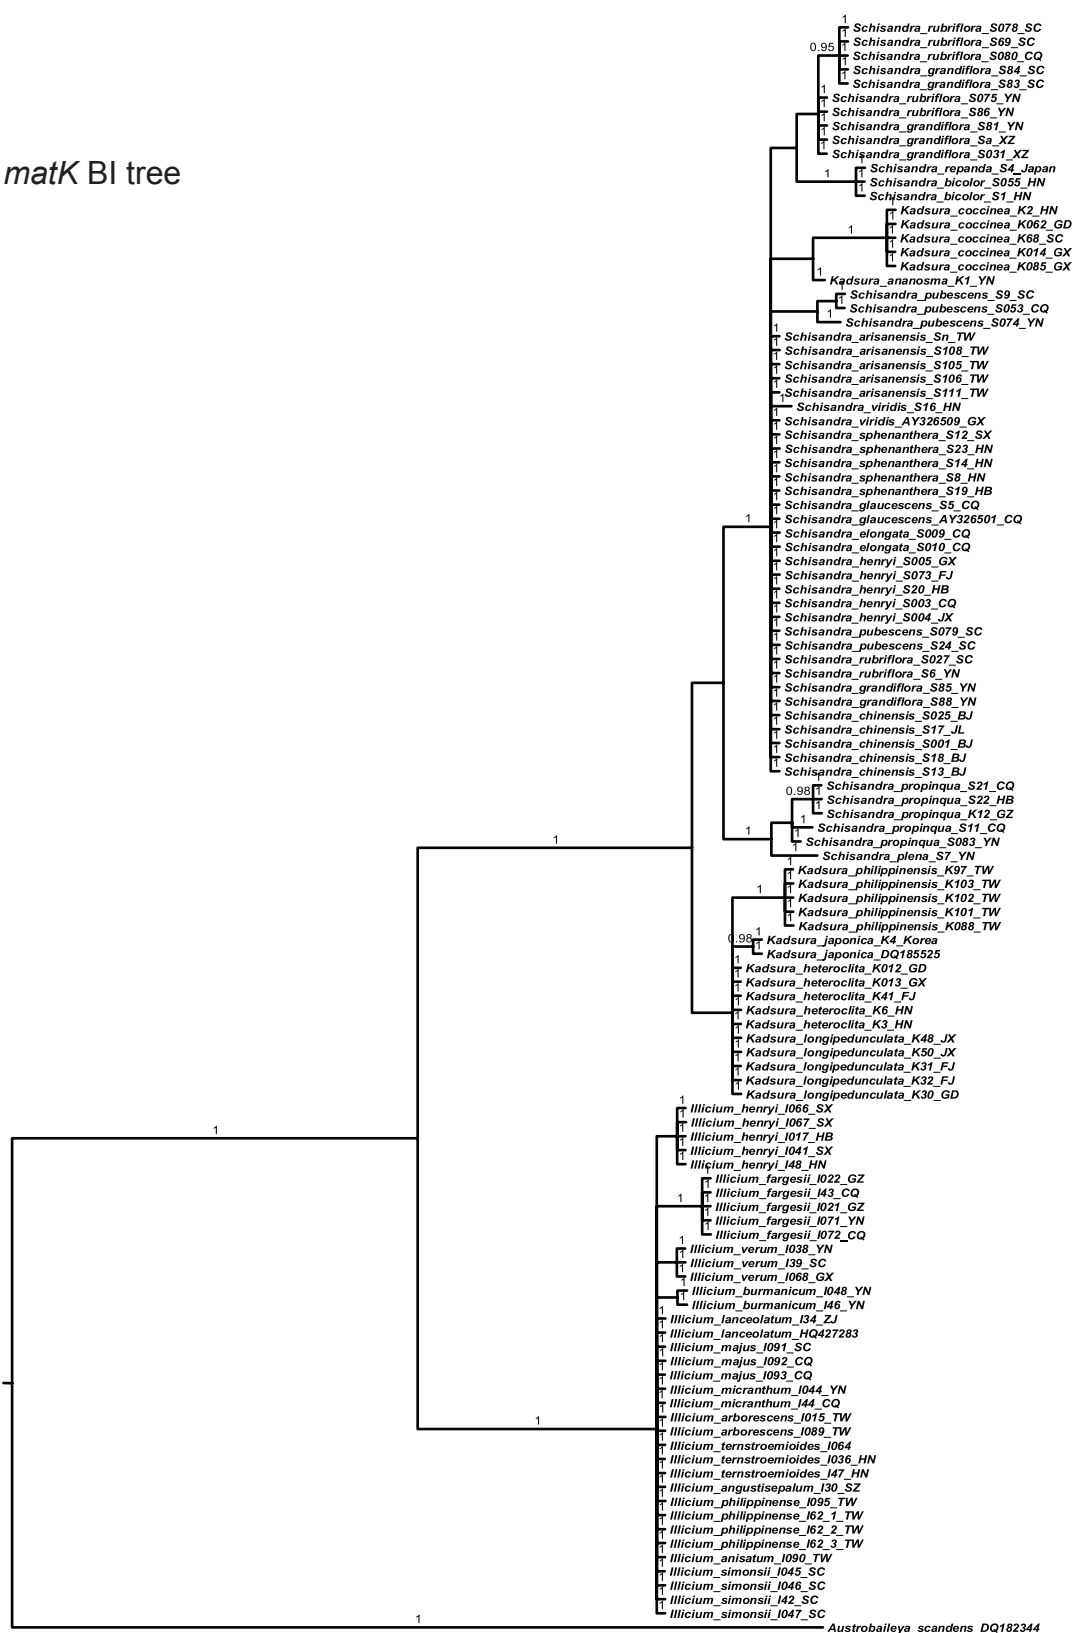

rbcL BI tree

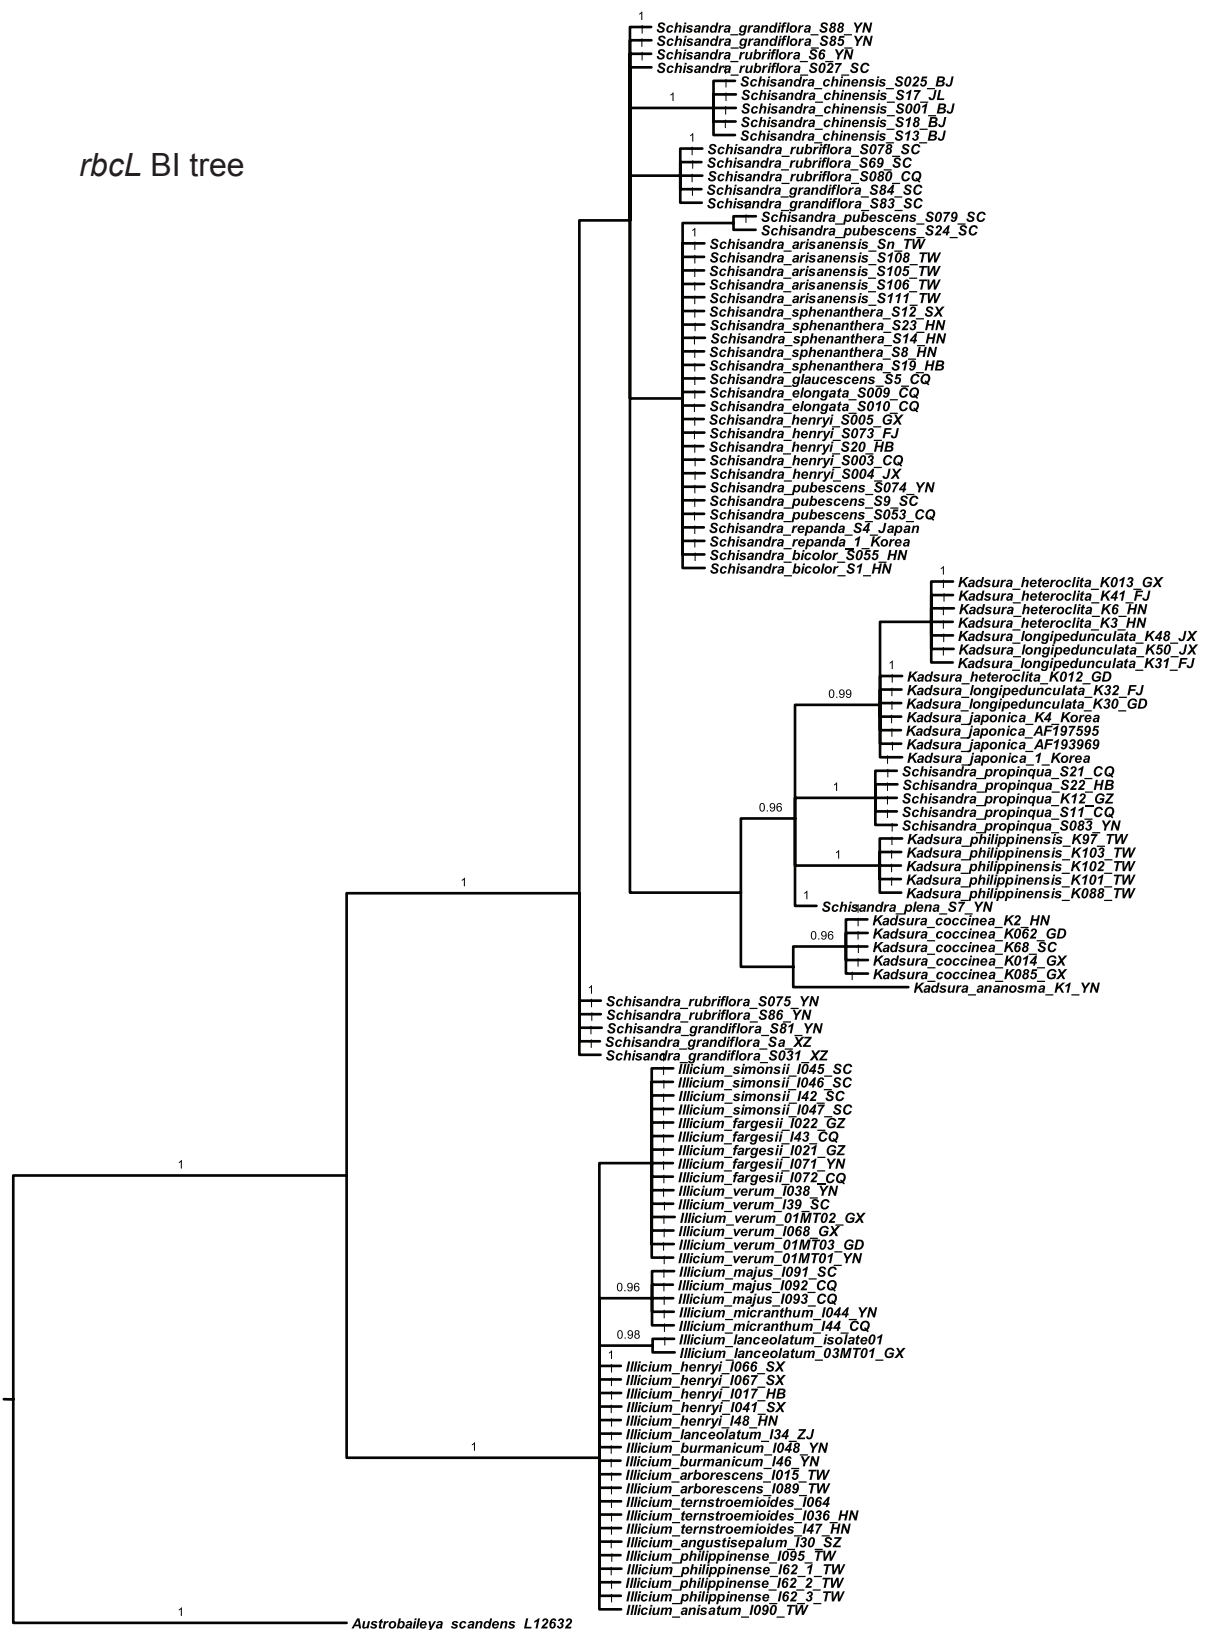

ITS-*trnH-psbA* BI tree

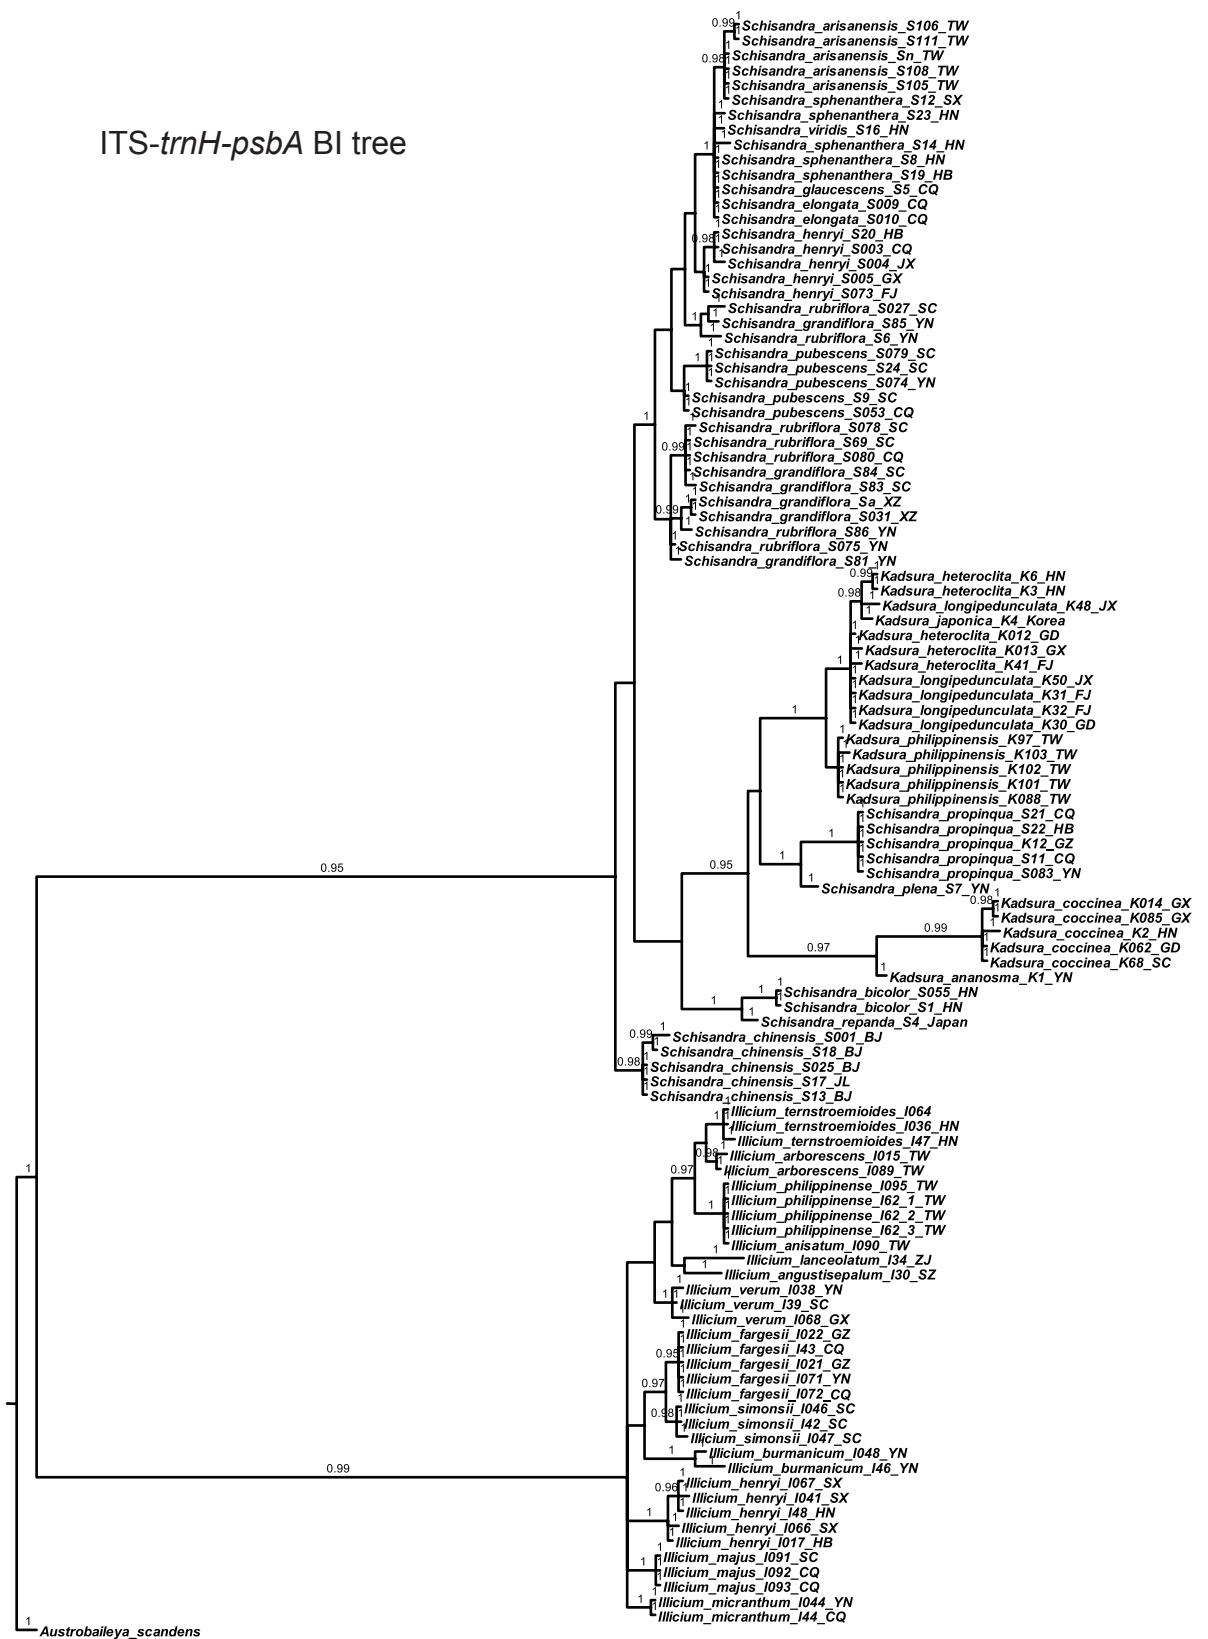

ITS-matK BI tree

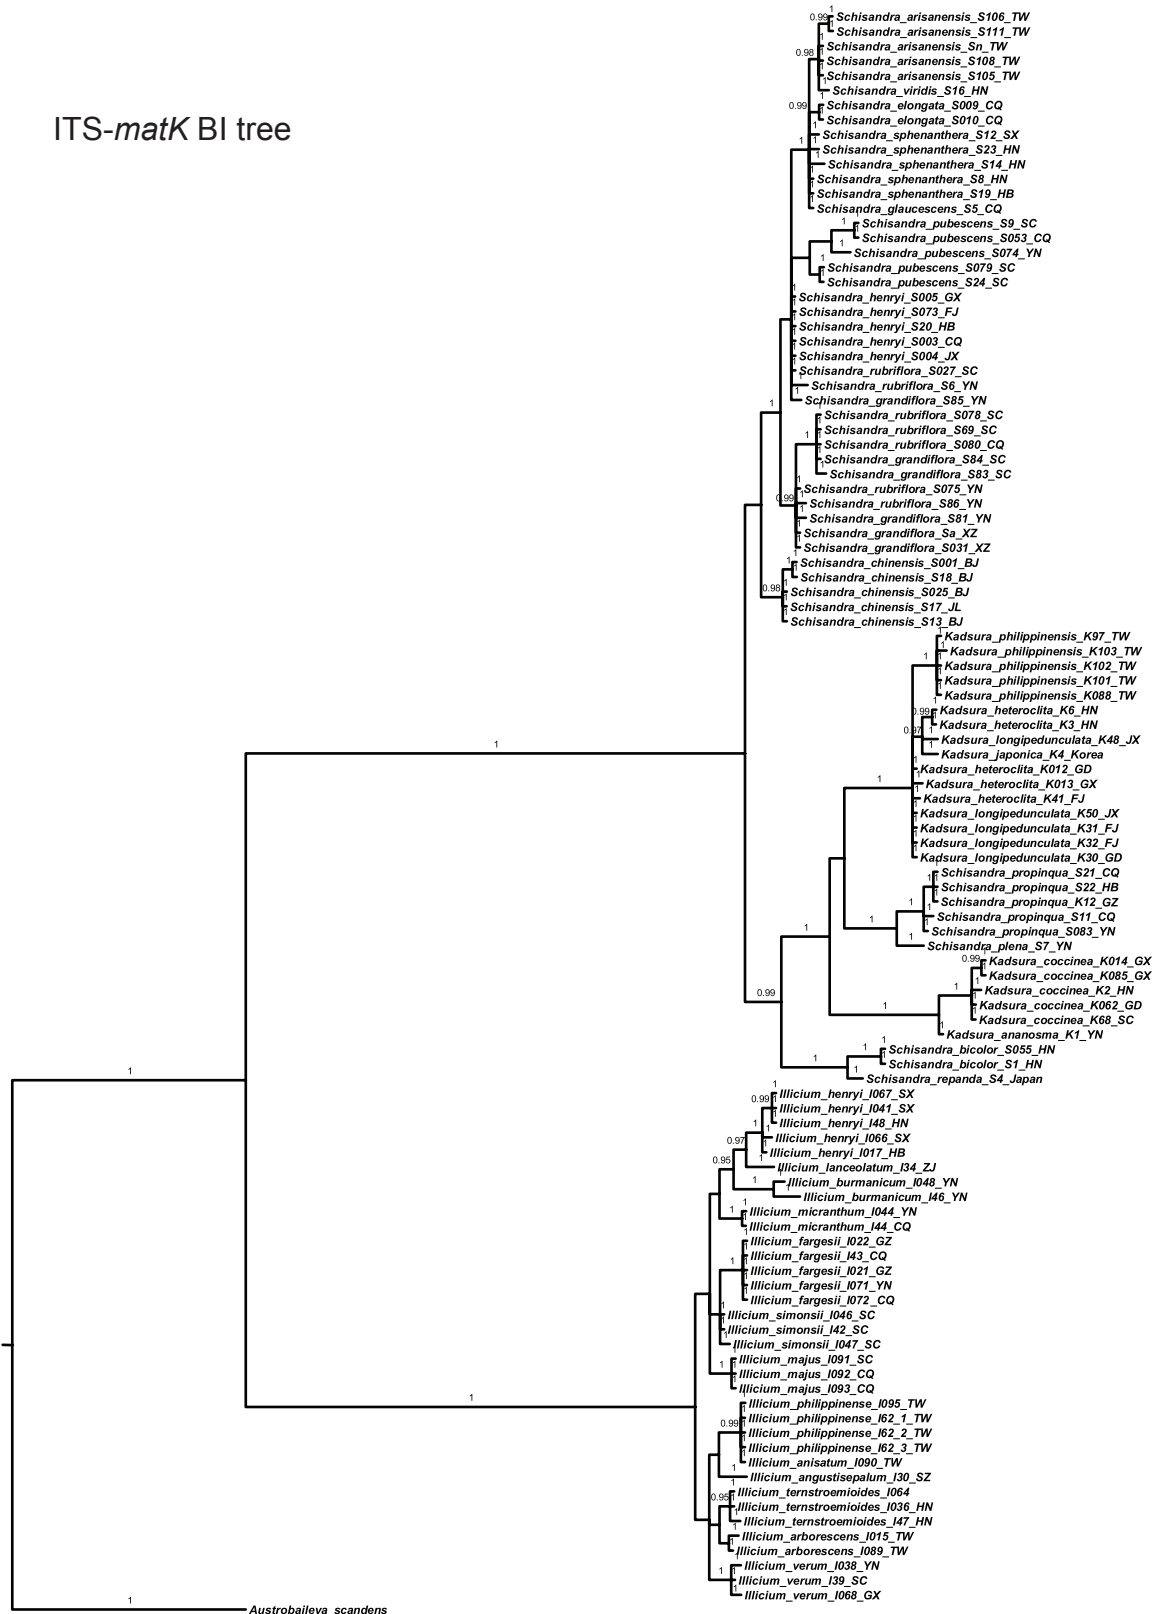



ITS-*rbcl* BI tree

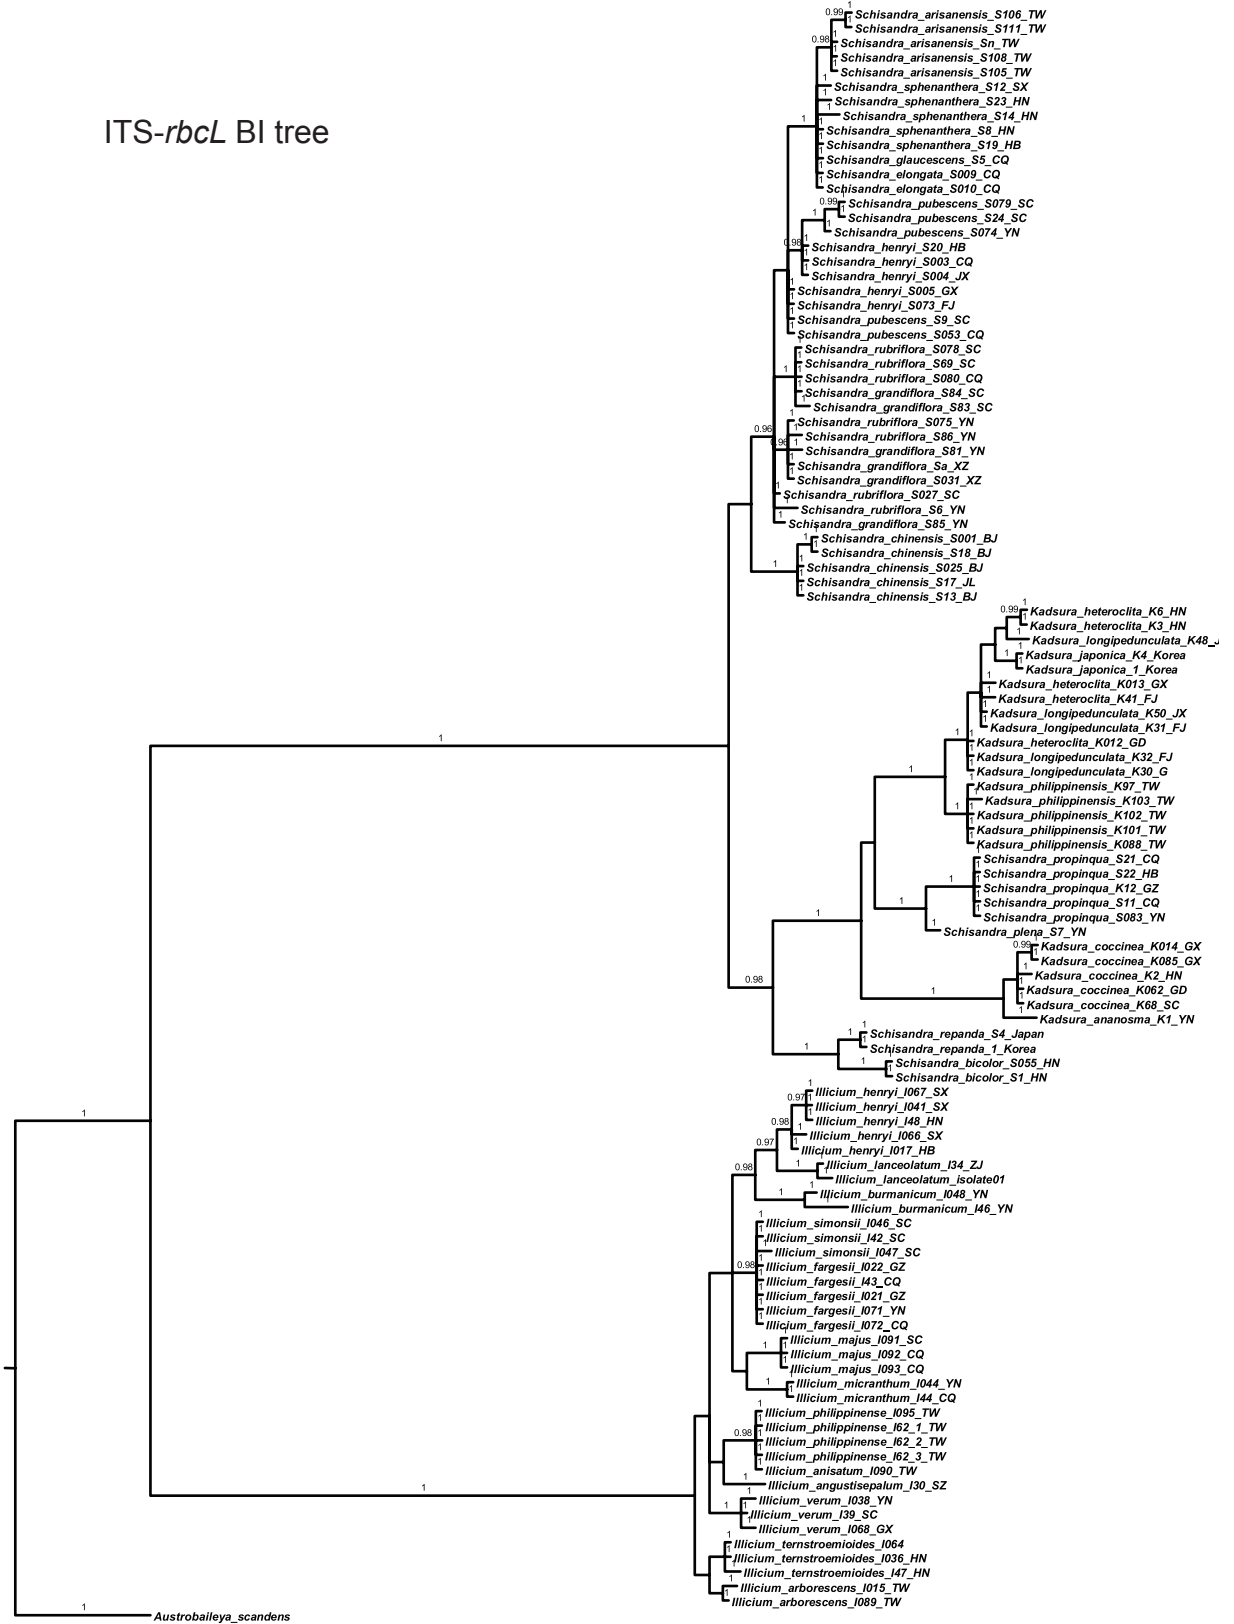

trnH-psbA-matK BI tree

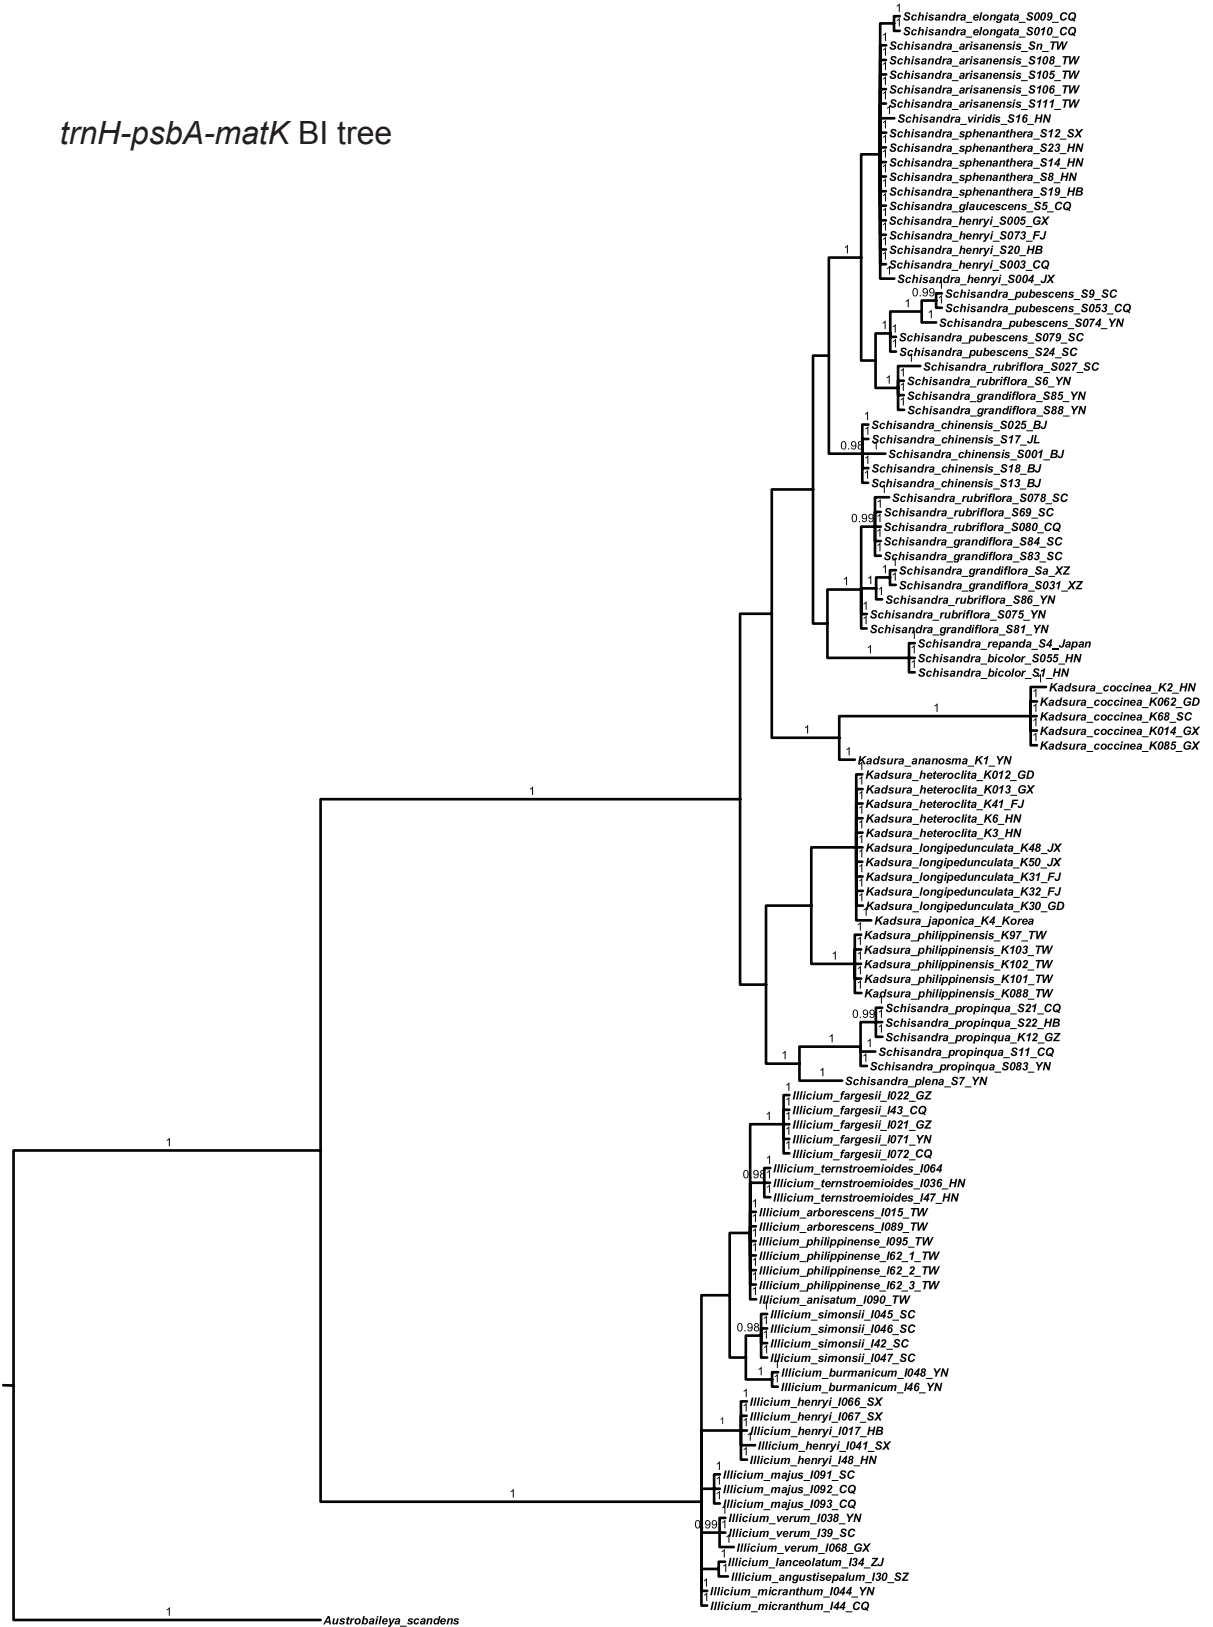

trnH-psbA-rbcL BI tree

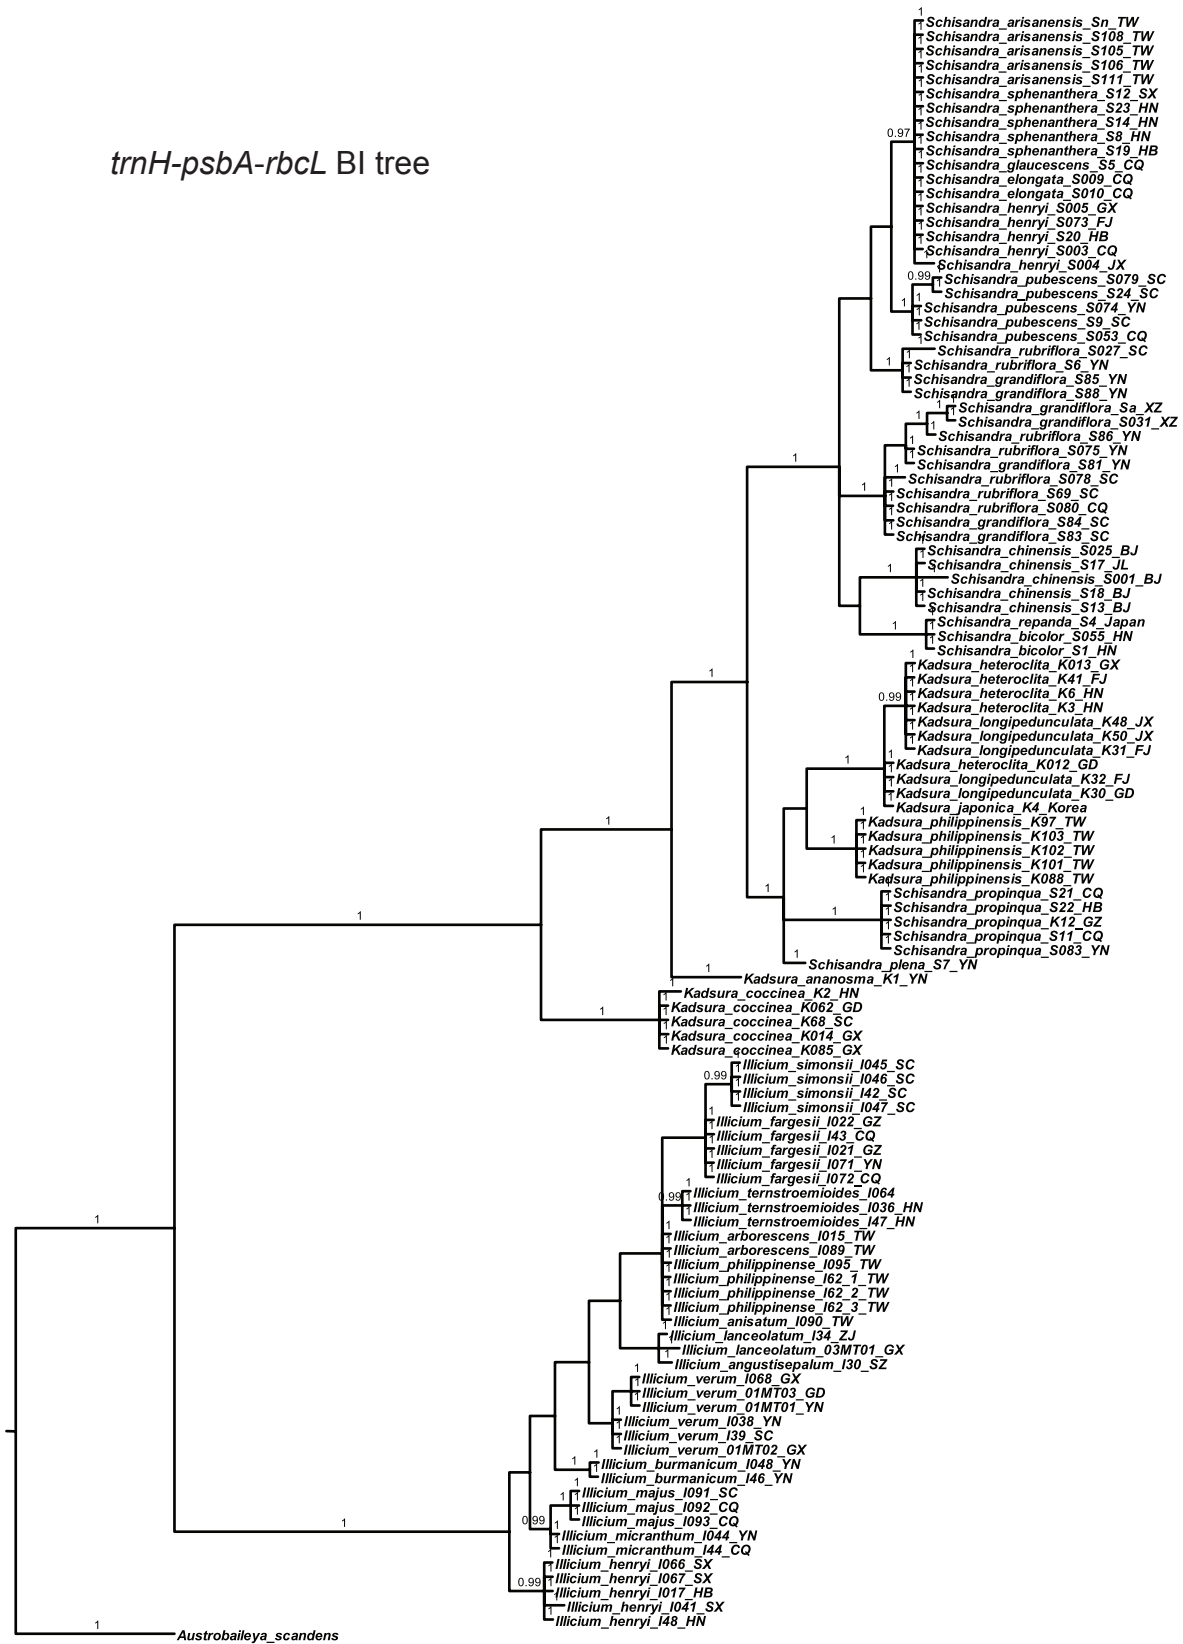

matK-rbcL BI tree

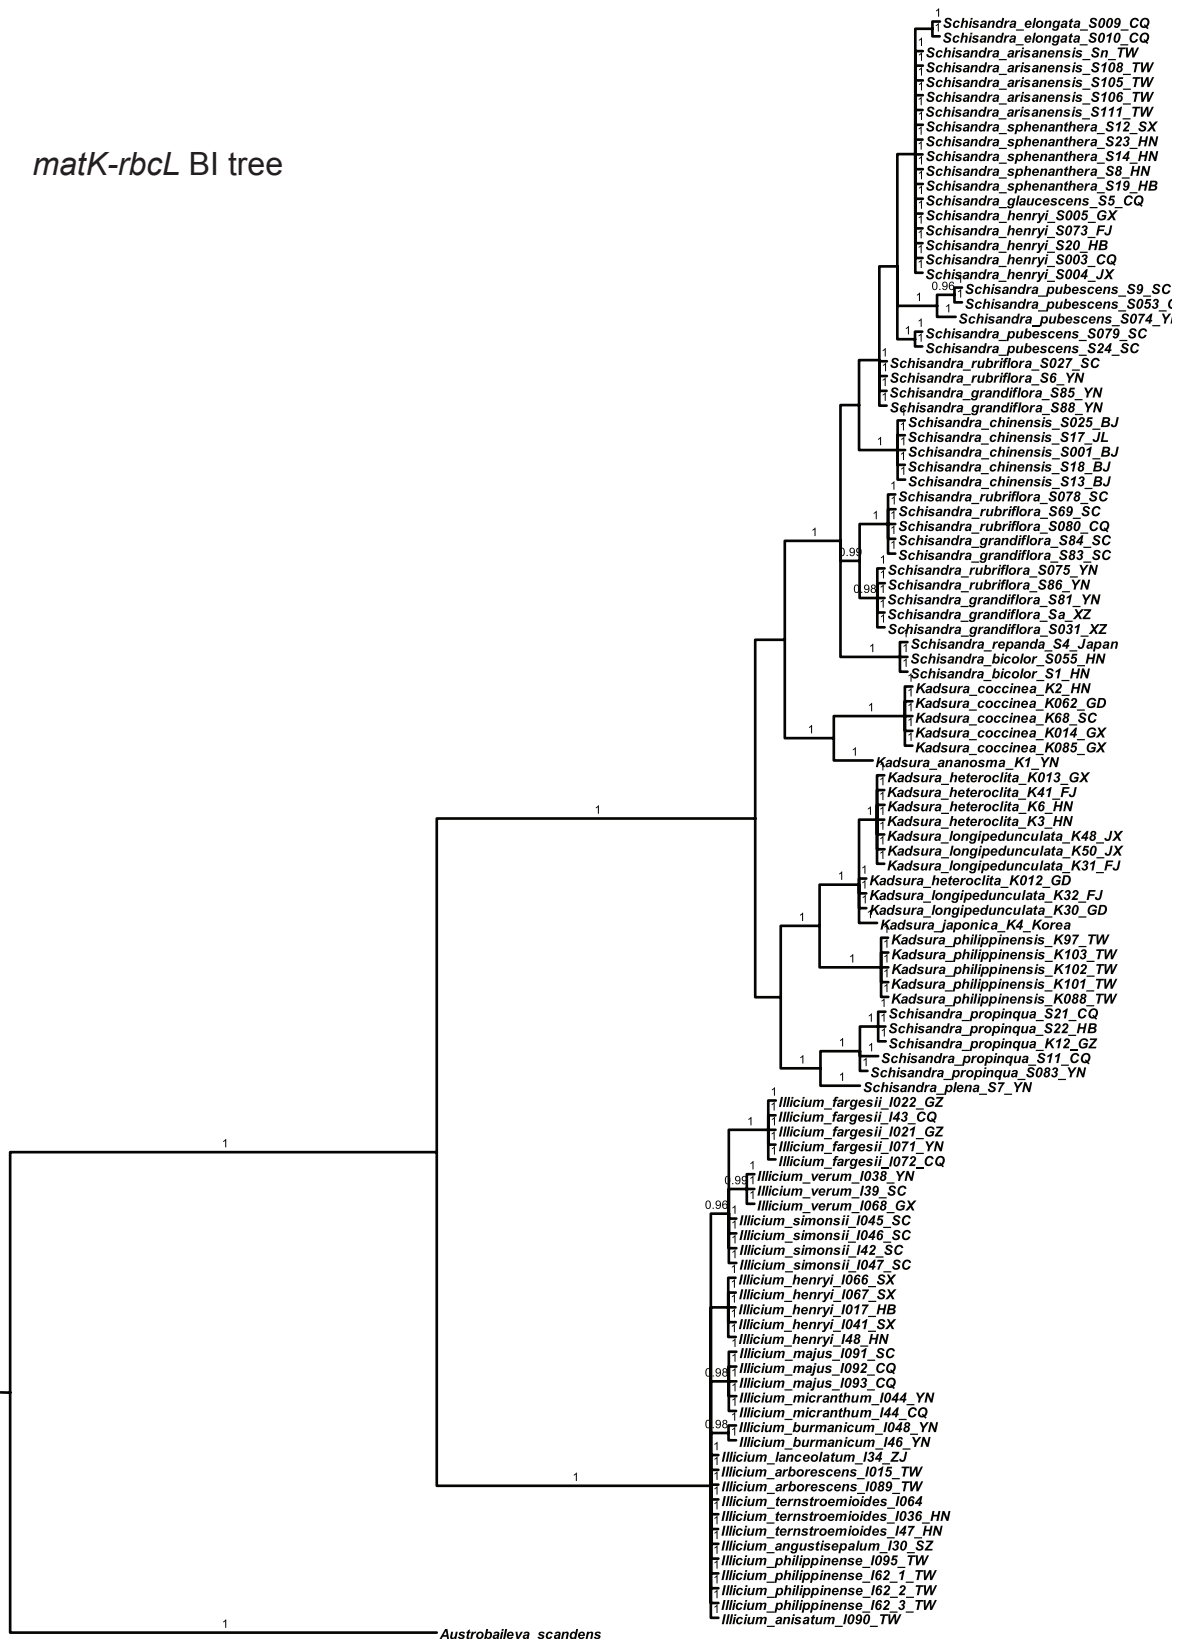

ITS-*trnH-psbA-matK* BI tree

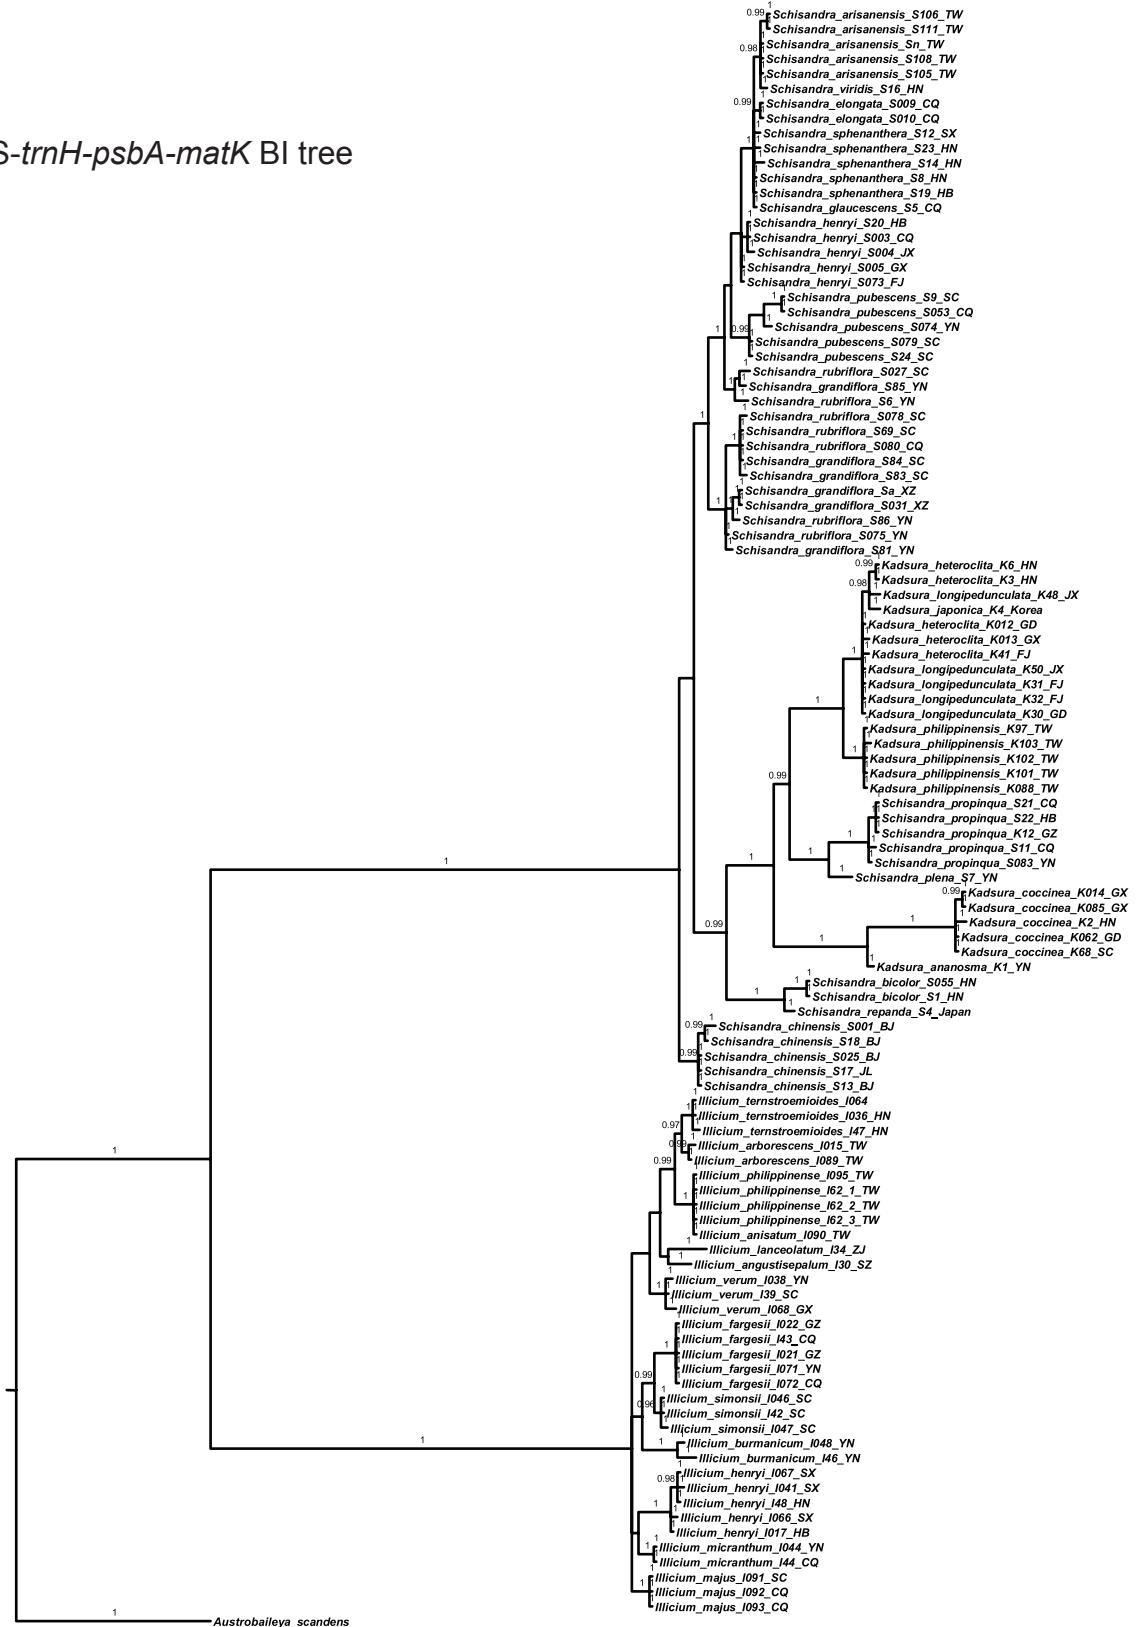

ITS-*trnH-psbA-rbcL* BI tree

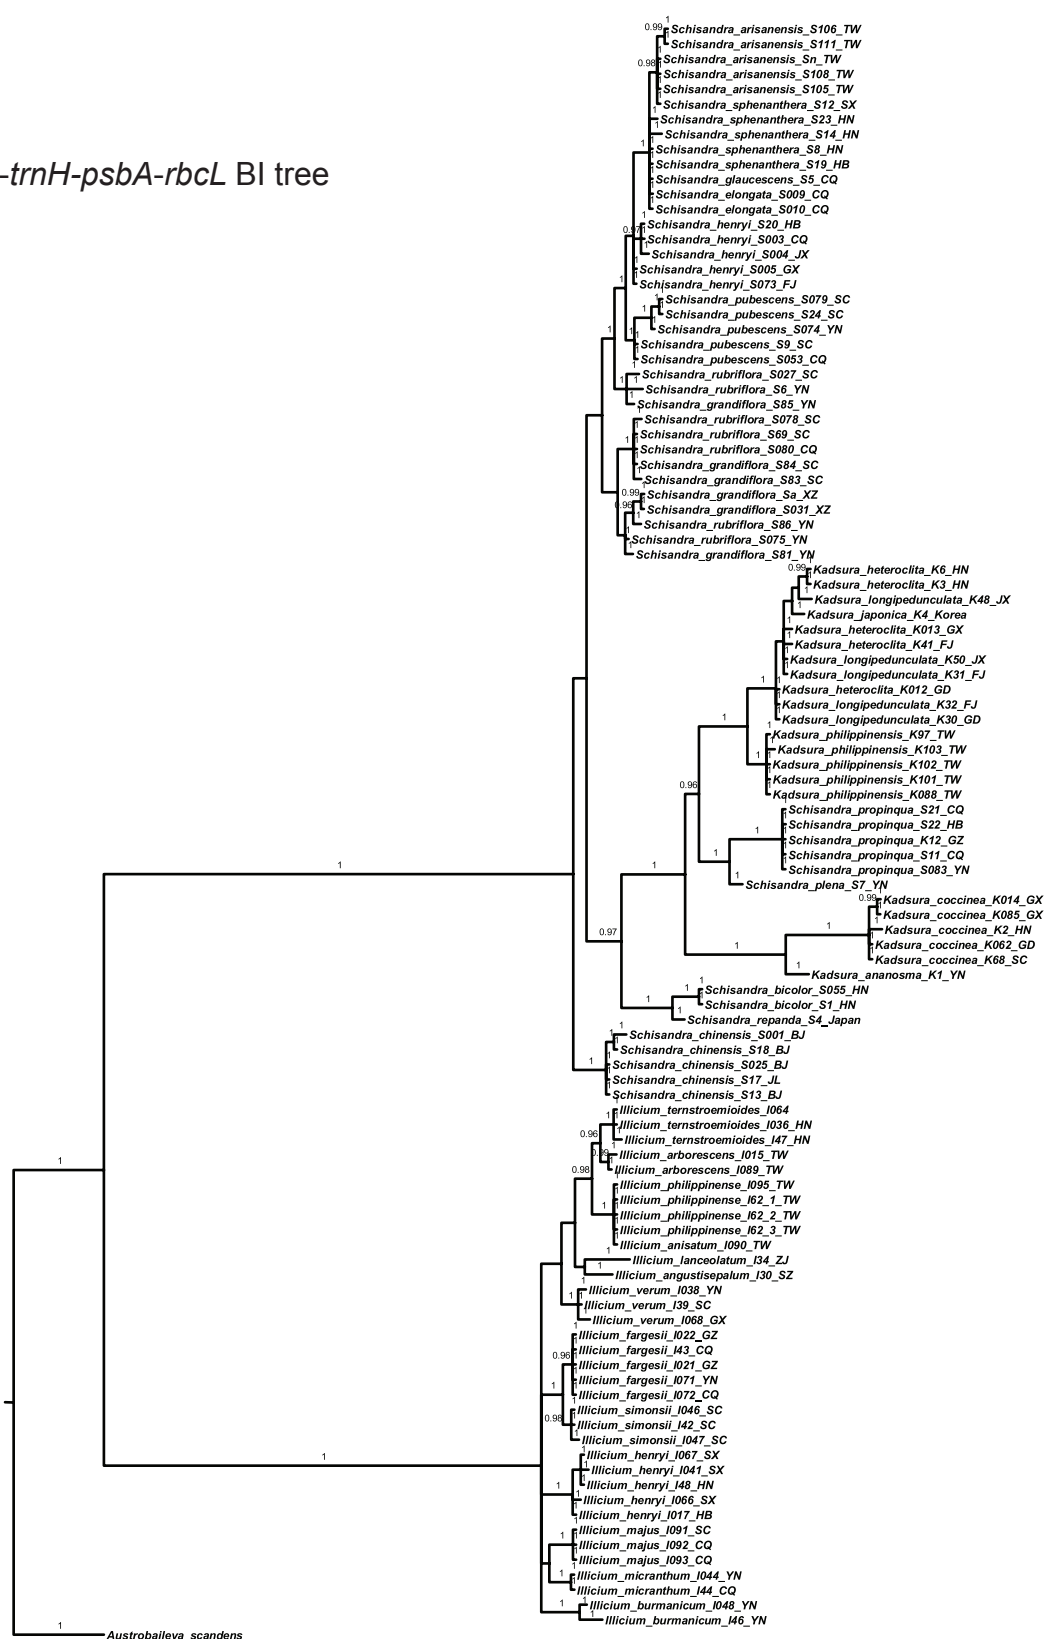

ITS-matK-rbcL BI tree

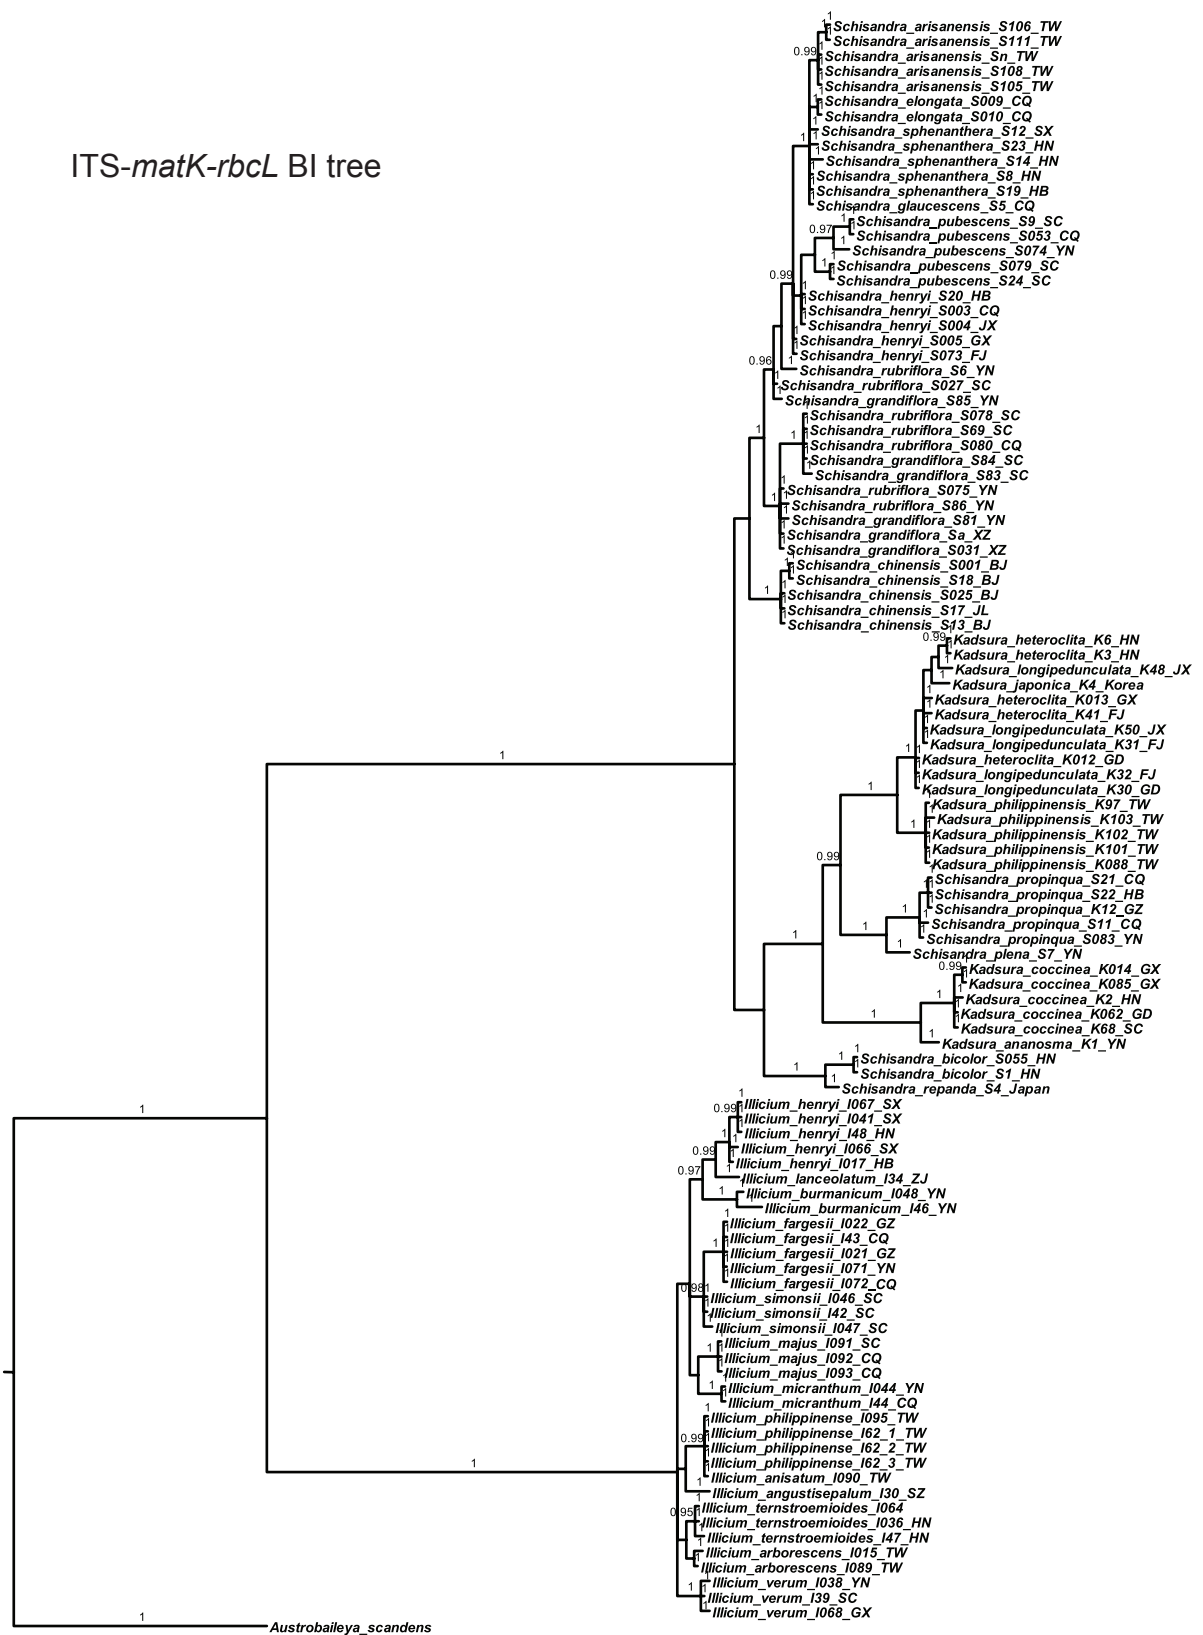

*trnH-psbA-matK-rbcL* BI tree

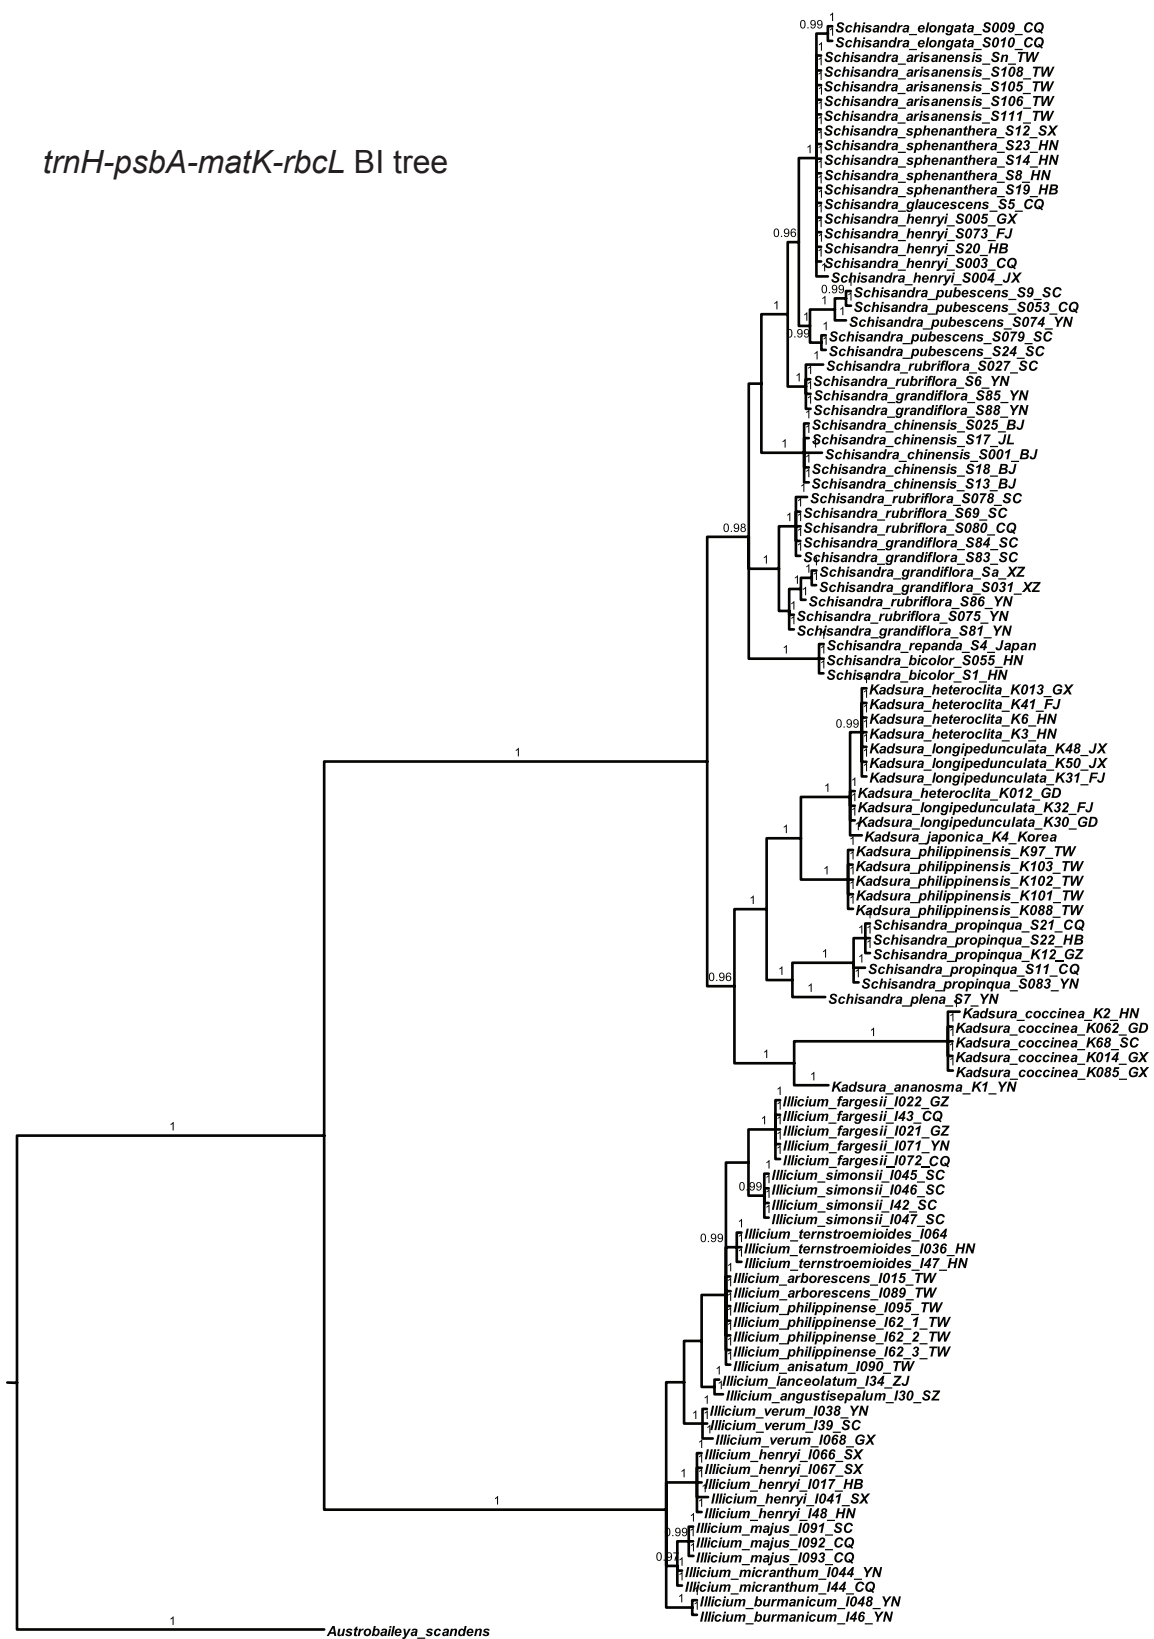



ITS-trnH-psbA-matK-rbcL BI tree

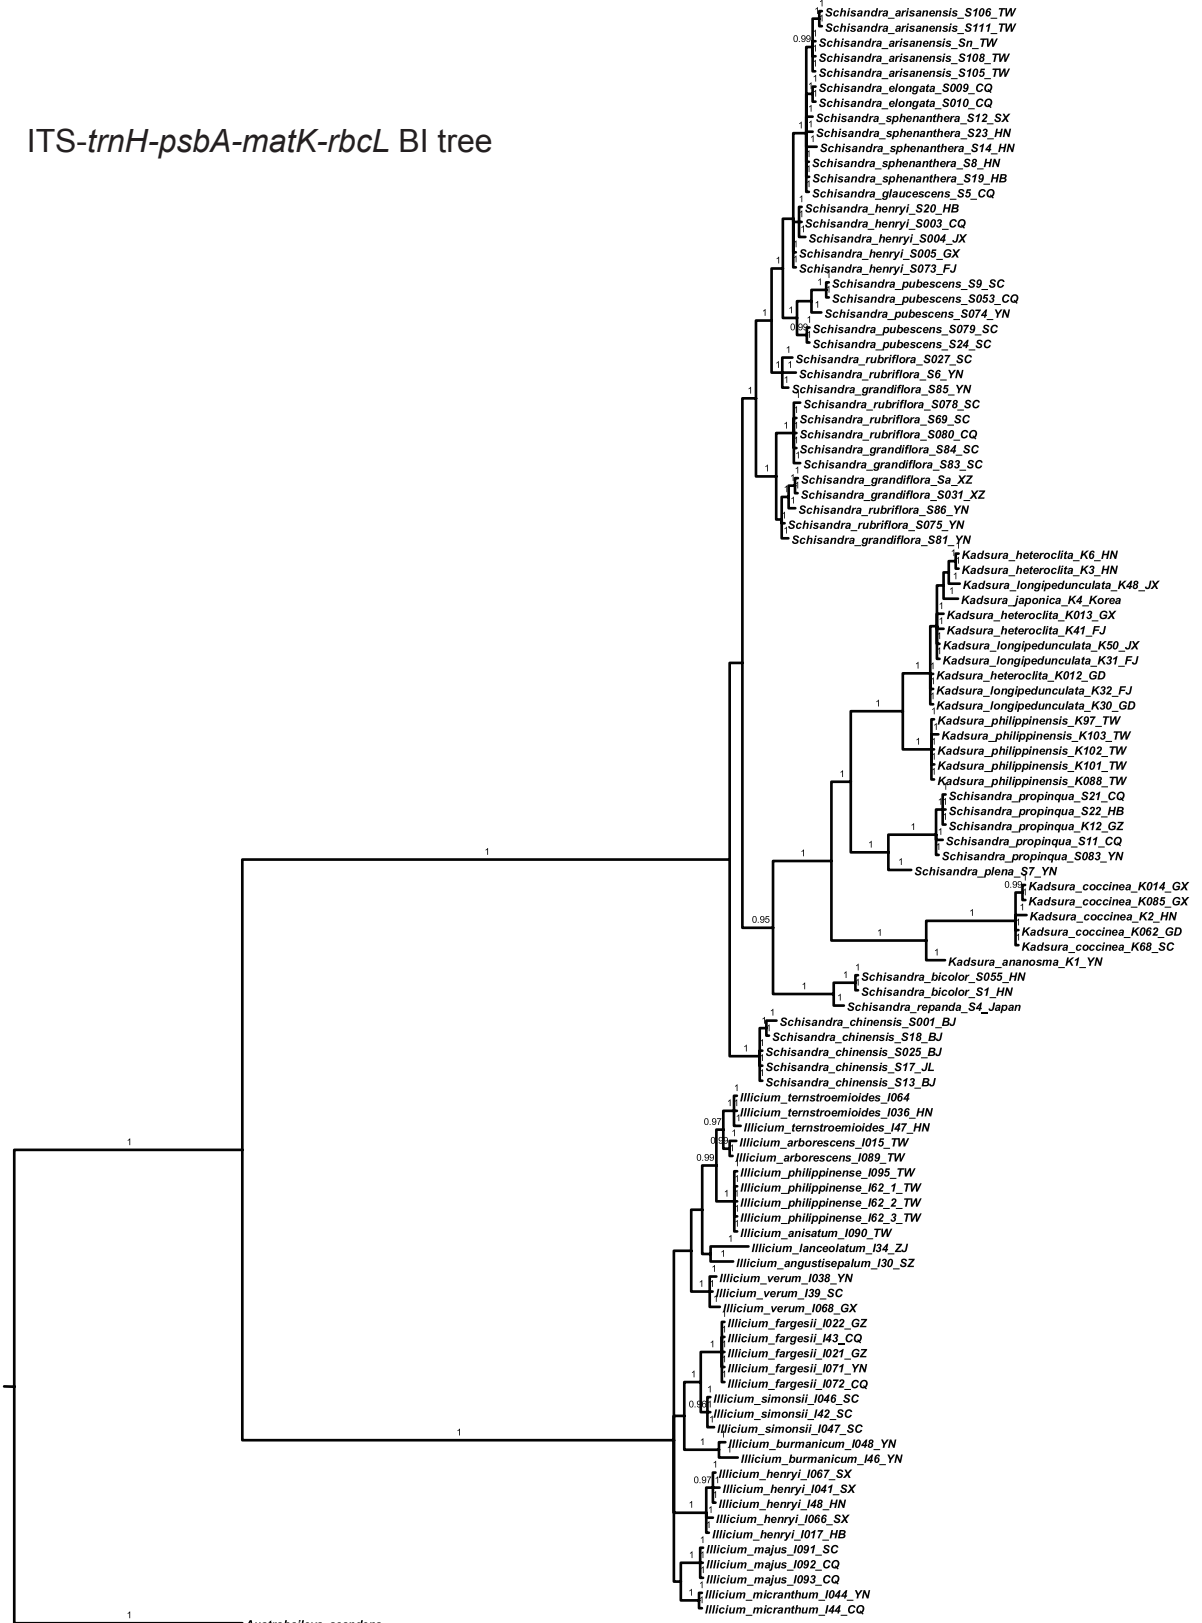

Supplement: pone.0125574.s002.pdf [file pone.0125574.s002.pdf]
