# Supplementary material for: Evaluation of Four Commonly Used DNA Barcoding Loci for Chinese Medicinal Plants of the Family Schisandraceae
Source: PLoS One. 2015 May 4;10(5):e0125574. doi: 10.1371/journal.pone.0125574 (PMC4418597; doi:10.1371/journal.pone.0125574)
Supplement: S6 Table — (XLS) [file pone.0125574.s008.xls]

## Sheet: S6 Table
S6 Table. Character-based DNA barcoding analysis for Schisandraceae species based on the trnH-psbA region.
Taxa (n)	Position
	84	87	109	110	111	112	113	114	119	120	121	122	123	124	125	126	138	139	140	141	142	145	149	172	179	183	186	187	188	189	190	191	192	193	194	195	196	197	198	223	224	225	226	231	256	269	270	271	272
Schisandra
S. arisanensis (5)	A	C	C	A	A	A	C	C	G	A	G	A	A	A	A	-	-	-	-	-	-	T	T	C	-	-	G	T	A	G	T	G	T	T	T	T	A	T	T	-	-	-	-	C	A	-	-	-	-
S. viridis (1)	A	C	C	A	A	A	C	C	G	A	G	A	A	A	A	-	-	-	-	-	-	T	T	C	-	-	G	T	A	G	T	G	T	T	T	T	A	T	T	-	-	-	-	C	A	-	-	-	-
S. sphenanthera (5)	A	C	C	A	A	A	C	C	G	A	G	A	A	A	A	-	-	-	-	-	-	T	T	C	-	-	G	T	A	G	T	G	T	T	T	T	A	T	T	-	-	-	-	C	A	-	-	-	-
S. glaucescens (1)	A	C	C	A	A	A	C	C	G	A	G	A	A	A	A	-	-	-	-	-	-	T	T	C	-	-	G	T	A	G	T	G	T	T	T	T	A	T	T	-	-	-	-	C	A	-	-	-	-
S. elongata (2)	A	C	C	A	A	A	C	C	G	A	G	A	A	A	A	-	-	-	-	-	-	T	T	C	-	-	G	T	A	G	T	G	T	T	T	T	A	T	T	-	-	-	-	C	A	-	-	-	-
S. henryi (5)	A	C	C	A	A	A	C	C	G	A	G	A	A	A	A	-	-	-	-	-	-	T	T	C	-	-	G	T	A	G	T	G	T	T	T	T	A	T	T	-	-	-	-	C	A	-	-	-	-
S. pubescens (5)	A	C	C	A	A	A	C	C	G	A	G	A	A	A	A	-	-	-	-	-	-	T	T	C	-	-	G	T	A	G	T	G	T	T	T	T	A	T	T	-	-	-	-	G	A	-	-	-	-
S. rubriflora I (2)	A	C	C	A	A	A	C	C	G	A	G	A	A	A	A	-	-	-	-	-	-	T	T	C	-	-	G	T	A	G	T	G	T	T	T	T	A	T	T	-	-	-	-	C	A	T	A	T	T
S. grandiflora I (2)	A	C	C	A	A	A	C	C	G	A	G	A	A	A	A	-	-	-	-	-	-	T	T	C	-	-	G	T	A	G	T	G	T	T	T	T	A	T	T	-	-	-	-	C	A	T	A	T	T
S. rubriflora II-1 (2)	A	C	C	A	A	A	C	C	G	A	G	A	A	A	A	-	-	-	-	-	-	T	T	T	G(1)/-(1)	T(1)/-(1)	G	T	A	G	T	G	T	T	T	T	A	T	T	-	-	-	-	A	A	-	-	-	-
S. grandiflora II-1 (3)	A	C	C	A	A	A	C	C	G	A	G	A	A	A	A	-	-	-	-	-	-	T	T	T	-	-	G	T	A	G	T	G	T	T	T	T	A	T	T	A	T	T	T	A	A	-	-	-	-
S. rubriflora II-2 (3)	A	C	C	A	A	A	C	C	G	A	G	A	A	A	A	-	-	-	-	-	-	T	T	T	-	-	G	T	A	G	T	G	T	T	T	T	A	T	T	-	-	-	-	A	A	-	-	-	-
S. grandiflora II-2 (2)	A	C	C	A	A	A	C	C	G	A	G	A	A	A	A	-	-	-	-	-	-	T	T	T	-	-	G	T	A	G	T	G	T	T	T	T	A	T	T	-	-	-	-	A	A	-	-	-	-
S. chinensis (5)	A	C	C	A	A	A	C	C	G	A	G	A	A	A	A	-	-	-	-	-	-	T	T	C	-	-	G	T	A	G	T	G	T	T	T	T	G	T	T	-	-	-	-	C	A	-	-	-	-
S. repanda (1)	A	C	C	A	A	A	C	C	G	A	G	A	A	A	A	-	-	-	-	-	-	T	T	C	-	-	G	T	A	G	T	G	T	T	T	T	A	T	T	-	-	-	-	C	A	-	-	-	-
S. bicolor (2)	A	C	C	A	A	A	C	C	G	A	G	A	A	A	A	-	-	-	-	-	-	T	T	C	-	-	G	T	A	G	T	G	T	T	T	T	A	T	T	-	-	-	-	C	A	-	-	-	-
S. propinqua (5)	A	C	C	C	A	A	C	C	G	A	G	A	A	A	A	-	-	-	-	-	-	T	T	-	-	-	G	T	A	G	T	G	T	T	T	T	A	T	T	-	-	-	-	-	-	-	-	-	-
S. plena (1)	A	C	C	A	A	A	C	C	G	A	G	A	A	A	A	-	-	-	-	-	-	T	T	-	-	-	G	T	A	G	T	G	T	T	T	T	A	T	T	-	-	-	-	-	-	-	-	-	-
Kadsura
K. philippinensis (5)	A	C	C	A	A	A	C	C	G	A	G	A	A	A	A	-	-	-	-	-	-	T	T	-	-	-	-	-	-	-	-	-	-	-	-	-	-	-	-	-	-	-	-	-	-	-	-	-	-
K. heteroclita (5)	A	C	C	A	A	A	C	C	G	A	G	A	A	A	A	-	-	-	-	-	-	T	T	C	-	-	G	T	A	G	T	G	T	T	T	T	A	T	T	-	-	-	-	-	-	-	-	-	-
K. longipedunculata (5)	A	C	C	A	A	A	C	C	G	A	G	A	A	A	A	-	-	-	-	-	-	T	T	C	-	-	G	T	A	G	T	G	T	T	T	T	A	T	T	-	-	-	-	-	-	-	-	-	-
K. japonica (1)	A	C	C	A	A	A	C	C	G	A	G	A	A	A	A	-	-	-	-	-	-	T	T	C	-	-	G	T	A	G	T	G	T	T	T	T	A	T	T	-	-	-	-	-	-	-	-	-	-
K. coccinea (5)	A	C	C	C	A	A	T	T	G	T	T	T	T	C	T	-	-	-	-	-	-	T	-	C	-	-	G	T	A	G	T	G	T	T	T	T	A	T	T	-	-	-	-	-	-	-	-	-	-
K. ananosma (1)	A	C	C	A	A	A	C	C	G	A	G	A	A	A	A	-	T	T	G	G	T	T	T	-	C	C	G	T	A	G	T	G	T	T	T	T	A	T	T	-	-	-	-	-	-	-	-	-	-
Illicium
I. henryi (5)	A	A	-	-	-	-	-	T	-	-	T	T	T	A	T	A	-	-	-	-	-	G	-	-	-	-	G	T	A	G	T	G	T	T	T	T	A	C	T	-	-	-	-	C	A	-	-	-	-
I. lanceolatum (2)	A	C	T	T	C	T	T	T	-	-	T	T	T	A	T	A	-	-	-	-	-	G	-	-	-	-	G	T	A	G	T	G	T	T	T	T	A	C	T	-	-	-	-	A	A	-	-	-	-
I. majus (3)	A	C	-	-	-	-	-	T	-	-	T	T	T	A	T	A	-	-	-	-	-	G	-	-	-	-	G	T	A	G	T	G	T	T	T	T	A	C	T	-	-	-	-	C	A	-	-	-	-
I. micranthum (2)	A	C	-	-	-	-	-	T	-	-	T	T	T	A	T	A	-	-	-	-	-	G	-	-	-	-	G	T	A	G	T	G	T	T	T	T	A	C	T	-	-	-	-	C	A	-	-	-	-
I. burmanicum (2)	A	C	-	-	-	-	-	T	G	T	T	T	T	A	T	A	-	-	-	-	-	G	-	-	-	-	G	T	A	G	T	G	T	T	T	T	A	C	T	-	-	-	-	C	G	-	-	-	-
I. arborescens (2)	A	C	-	-	-	-	-	T	G	T	T	T	T	A	T	A	-	-	-	-	-	G	-	-	-	-	G	T	A	G	T	G	T	T	T	T	A	C	T	-	-	-	-	A	A	-	-	-	-
I. ternstroemioides (3)	A	T	-	-	-	-	-	T	G	T	T	T	T	A	T	A	-	-	-	-	-	G	-	-	-	-	G	T	A	G	T	G	T	T	T	T	A	C	T	-	-	-	-	A	A	-	-	-	-
I. angustisepalum (1)	A	C	-	-	-	-	-	T	T	T	T	T	T	A	T	A	-	-	-	-	-	G	-	-	-	-	G	T	A	G	T	G	T	T	T	T	A	C	T	-	-	-	-	A	A	-	-	-	-
I. philippinense (4)	A	C	-	-	-	-	-	T	G	T	T	T	T	A	T	A	-	-	-	-	-	G	-	-	-	-	G	T	A	G	T	G	T	T	T	T	A	C	T	-	-	-	-	A	A	-	-	-	-
I. anisatum (1)	A	C	-	-	-	-	-	T	G	T	T	T	T	A	T	A	-	-	-	-	-	G	-	-	-	-	G	T	A	G	T	G	T	T	T	T	A	C	T	-	-	-	-	A	A	-	-	-	-
I. simonsii (4)	G	C	-	-	-	-	-	T	G	T	T	T	T	A	T	A	-	-	-	-	-	G	-	-	-	-	G	T	A	G	T	G	T	T	T	T	A	C	T	-	-	-	-	A	A	-	-	-	-
I. fargesii (5)	A	C	-	-	-	-	-	T	-	-	T	T	T	A	T	A	-	-	-	-	-	G	-	-	-	-	G	T	A	G	T	G	T	T	T	T	A	C	T	-	-	-	-	A	A	-	-	-	-
I. verum (6)	A	C	-	-	-	-	-	T	G	T	T	T	T	A	T	A	-	-	-	-	-	G	-	-	-	-	G	T	A	G	T	G	T	T	T	T	A	C	T	-	-	-	-	A	A	-	-	-	-
						1	1	1		2	2	2	2		2	2						3	3
The single pure diagnostic characters at the species level are shaded in light grey. The characters that could be used as compound CAs after combining with nearby CAs at the genus level are shaded in dark grey, and the corresponding columns are labeled with Arabic numerals.
The nucleotide variants for different individuals of S. rubriflora and S. grandiflora are boxed.
And ‘-’ indicates indels. The number of individuals is shown in the parentheses.
[truncated: 74 more columns]
